# Supplementary material
Source: publisher figshare collection journal article supplement (https://tandf.figshare.com/articles/dataset/_/14222794)
Supplement: Supplementary file 1 [file 1]

## Sheet: metadata
Sample name	title	source name	organism	characteristics: Input (ng)	characteristics: Filler DNA methylation ratio	characteristics: Filler DNA amount (ng)	characteristics: MBD protein (μg)	characteristics: MBD-specific beads (μl)	characteristics: Wash	characteristics: Elution fraction	characteristics: Elution salt level
3	2μg MBD 30μl beads rep1	Pooled healthy plasma	Homo sapiens	3	100% ME	97	2	30	Standard	Single	High
48	2μg MBD 30μl beads rep2	Pooled healthy plasma	Homo sapiens	3	100% ME	97	2	30	Standard	Single	High
49	2μg MBD 30μl beads rep3	Pooled healthy plasma	Homo sapiens	3	100% ME	97	2	30	Standard	Single	High
6	2μg MBD 3μl beads rep1	Pooled healthy plasma	Homo sapiens	3	100% ME	97	2	3	Standard	Single	High
44	2μg MBD 3μl beads rep2	Pooled healthy plasma	Homo sapiens	3	100% ME	97	2	3	Standard	Single	High
45	2μg MBD 3μl beads rep3	Pooled healthy plasma	Homo sapiens	3	100% ME	97	2	3	Standard	Single	High
7	Unmethylated filler rep1	Pooled healthy plasma	Homo sapiens	3	100% UNME	97	0.2	3	Standard	Single	High
61	Unmethylated filler rep2	Pooled healthy plasma	Homo sapiens	3	100% UNME	97	0.2	3	Standard	Single	High
62	Unmethylated filler rep3	Pooled healthy plasma	Homo sapiens	3	100% UNME	97	0.2	3	Standard	Single	High
8	50% methylated filler rep1	Pooled healthy plasma	Homo sapiens	3	50% ME + 50% UNME	97	0.2	3	Standard	Single	High
63	50% methylated filler rep2	Pooled healthy plasma	Homo sapiens	3	50% ME + 50% UNME	97	0.2	3	Standard	Single	High
64	50% methylated filler rep3	Pooled healthy plasma	Homo sapiens	3	50% ME + 50% UNME	97	0.2	3	Standard	Single	High
12	0.2μg MBD 30μl beads rep1	Pooled healthy plasma	Homo sapiens	3	100% ME	97	0.2	30	Standard	Single	High
46	0.2μg MBD 30μl beads rep2	Pooled healthy plasma	Homo sapiens	3	100% ME	97	0.2	30	Standard	Single	High
47	0.2μg MBD 30μl beads rep3	Pooled healthy plasma	Homo sapiens	3	100% ME	97	0.2	30	Standard	Single	High
16	Standard wash Single high elution	Pooled healthy plasma	Homo sapiens	3	100% ME	97	0.2	3	Standard	Single	High
17	Standard wash Single medium elution	Pooled healthy plasma	Homo sapiens	3	100% ME	97	0.2	3	Standard	Single	Medium
18	Standard wash Single low elution	Pooled healthy plasma	Homo sapiens	3	100% ME	97	0.2	3	Standard	Single	Low
19	Standard wash Multiple low elution	Pooled healthy plasma	Homo sapiens	3	100% ME	97	0.2	3	Standard	Multiple	Low
20	Standard wash Multiple medium elution	Pooled healthy plasma	Homo sapiens	3	100% ME	97	0.2	3	Standard	Multiple	Medium
21	Standard wash Multiple high elution	Pooled healthy plasma	Homo sapiens	3	100% ME	97	0.2	3	Standard	Multiple	High
22	Standard wash Multiple medium+high elution	Pooled healthy plasma	Homo sapiens	3	100% ME	97	0.2	3	Standard	Multiple	Medium+High
23	Standard wash Multiple low+medium+high elution	Pooled healthy plasma	Homo sapiens	3	100% ME	97	0.2	3	Standard	Multiple	Low+Medium+High
24	Double wash Single high elution	Pooled healthy plasma	Homo sapiens	3	100% ME	97	0.2	3	Double	Single	High
25	Double wash Single medium elution	Pooled healthy plasma	Homo sapiens	3	100% ME	97	0.2	3	Double	Single	Medium
26	Double wash Single low elution	Pooled healthy plasma	Homo sapiens	3	100% ME	97	0.2	3	Double	Single	Low
27	Double wash Multiple low elution	Pooled healthy plasma	Homo sapiens	3	100% ME	97	0.2	3	Double	Multiple	Low
28	Double wash Multiple medium elution	Pooled healthy plasma	Homo sapiens	3	100% ME	97	0.2	3	Double	Multiple	Medium
29	Double wash Multiple high elution	Pooled healthy plasma	Homo sapiens	3	100% ME	97	0.2	3	Double	Multiple	High
30	Double wash Multiple medium+high elution	Pooled healthy plasma	Homo sapiens	3	100% ME	97	0.2	3	Double	Multiple	Medium+High
31	Double wash Multiple low+medium+high elution	Pooled healthy plasma	Homo sapiens	3	100% ME	97	0.2	3	Double	Multiple	Low+Medium+High
38	500ng filler rep1	Pooled healthy plasma	Homo sapiens	3	100% ME	497	1	15	Standard	Single	High
39	500ng filler rep2	Pooled healthy plasma	Homo sapiens	3	100% ME	497	1	15	Standard	Single	High
40	1000ng filler rep1	Pooled healthy plasma	Homo sapiens	3	100% ME	997	2	30	Standard	Single	High
41	1000ng filler rep2	Pooled healthy plasma	Homo sapiens	3	100% ME	997	2	30	Standard	Single	High
51	1ng HCT116 DNA rep1	HCT116 cell line	Homo sapiens	1	100% ME	99	0.2	3	Standard	Single	High
52	1ng HCT116 DNA rep2	HCT116 cell line	Homo sapiens	1	100% ME	99	0.2	3	Standard	Single	High
53	10ng HCT116 DNA rep1	HCT116 cell line	Homo sapiens	10	100% ME	90	0.2	3	Standard	Single	High
54	10ng HCT116 DNA rep2	HCT116 cell line	Homo sapiens	10	100% ME	90	0.2	3	Standard	Single	High
55	100ng HCT116 DNA rep1	HCT116 cell line	Homo sapiens	100	100% ME	0	0.2	3	Standard	Single	High
56	100ng HCT116 DNA rep2	HCT116 cell line	Homo sapiens	100	100% ME	0	0.2	3	Standard	Single	High
57	1000ng HCT116 DNA rep1	HCT116 cell line	Homo sapiens	1000	100% ME	0	2	30	Standard	Single	High
58	1000ng HCT116 DNA rep2	HCT116 cell line	Homo sapiens	1000	100% ME	0	2	30	Standard	Single	High

## Sheet: Per-sample metrics
cfMBD-seq
Sample	Total reads	Reads aligned	RA % of total	Reads after filter	RAF % of aligned	Reads removed as duplicate	RRAD % of aligned	Reads used for coverage	RUFC % of aligned	Noise	Peak
16	17608222	17608222	1	14672825	0.833	602832	0.034	14069993	0.799	0.1182	30.1401
17	28900931	28900931	1	24016369	0.831	1157161	0.04	22859208	0.791	0.1076	29.4849
18	24384214	24384214	1	20294807	0.832	824524	0.034	19470283	0.798	0.1227	29.7025
19	33946695	33946695	1	28793227	0.848	1205252	0.036	27587975	0.813	0.1688	29.16
24	26667599	26667599	1	22359065	0.838	868543	0.033	21490522	0.806	0.1581	30.3601
25	24260634	24260634	1	20083658	0.828	835208	0.034	19248450	0.793	0.1227	30.4704
26	24855034	24855034	1	20629101	0.83	990449	0.04	19638652	0.79	0.1287	29.8116
27	22721062	22721062	1	18838290	0.829	793582	0.035	18044708	0.794	0.1208	30.25
Low-input MBD-seq
Sample	Total reads	Reads aligned	RA % of total	Reads after filter	RAF % of aligned	Reads removed as duplicate	RRAD % of aligned	Reads used for coverage	RUFC % of aligned	Noise	Peak
5ng-1	70452565	70452565	1	60188842	0.854	1905253	0.027	58283589	0.827	0.1393	15.9201
5ng-2	61898277	61898277	1	53107629	0.858	1587369	0.026	51520260	0.832	0.1699	15.7609
10ng-1	69634366	69634366	1	59501549	0.854	1834848	0.026	57666701	0.828	0.1141	15.2881
10ng-2	68178913	68178913	1	57869568	0.849	1908635	0.028	55960933	0.821	0.092	15.7609
cfMEDIP-seq
Sample	Total reads	Reads aligned	RA % of total	Reads after filter	RAF % of aligned	Reads removed as duplicate	RRAD % of aligned	Reads used for coverage	RUFC % of aligned	Noise	Peak
Control_01	38880541	38880541	1	29505209	0.759	6436241	0.166	23068968	0.593	0.0224	23.3289
Control_02	29546330	29546330	1	22482954	0.761	2619669	0.089	19863285	0.672	0.0204	22.8484
Control_03	8386220	8386220	1	6434818	0.767	165032	0.02	6269786	0.748	0.0189	24.01
Control_04	22572958	22572958	1	17100137	0.758	1768109	0.078	15332028	0.679	0.0237	23.4256
Control_05	48575880	48575880	1	36719965	0.756	11200630	0.231	25519335	0.525	0.0281	22.3729
Control_06	46457485	46457485	1	34653212	0.746	9274576	0.2	25378636	0.546	0.0219	23.6196
Control_07	41585557	41585557	1	30758244	0.74	4821263	0.116	25936981	0.624	0.0243	22.3729
Control_08	45065381	45065381	1	33528218	0.744	14405735	0.32	19122483	0.424	0.0261	23.7169
Control_09	42553971	42553971	1	31461717	0.739	5684412	0.134	25777305	0.606	0.0155	23.5225
Control_10	49643525	49643525	1	37188698	0.749	6177141	0.124	31011557	0.625	0.0212	22.6576
Control_11	48100372	48100372	1	36299602	0.755	8106140	0.169	28193462	0.586	0.0582	22.1841
Control_12	44372806	44372806	1	33024740	0.744	2988908	0.067	30035832	0.677	0.0219	21.8089
Control_13	44916153	44916153	1	33276167	0.741	4488592	0.1	28787575	0.641	0.0197	21.9961
Control_14	51107066	51107066	1	38102129	0.746	6015138	0.118	32086991	0.628	0.0146	24.1081
Control_15	48722290	48722290	1	36482869	0.749	4528342	0.093	31954527	0.656	0.0199	22.4676
Control_16	38039583	38039583	1	28540144	0.75	9174766	0.241	19365378	0.509	0.0213	24.2064
Control_17	47899276	47899276	1	35880140	0.749	12566189	0.262	23313951	0.487	0.0249	23.2324
Control_18	47085971	47085971	1	35240487	0.748	10664919	0.226	24575568	0.522	0.0205	22.7529
Control_19	41257707	41257707	1	30929708	0.75	2864695	0.069	28065013	0.68	0.0249	22.4676
Control_20	56053316	56053316	1	42038390	0.75	5632500	0.1	36405890	0.649	0.0209	22.5625
Control_21	45107300	45107300	1	33757039	0.748	3555493	0.079	30201546	0.67	0.0179	21.8089
Control_22	47809895	47809895	1	35630684	0.745	5589465	0.117	30041219	0.628	0.0201	22.3729
Control_23	38951902	38951902	1	29163481	0.749	5273676	0.135	23889805	0.613	0.0068	23.1361
Control_24	45642311	45642311	1	34352649	0.753	5562598	0.122	28790051	0.631	0.0147	22.09

## Sheet: TPM_normalized_counts
	Island_sum	Shore_sum	Shelf_sum	Inter_sum	Extended_sum
cfMBD03	208556	355131	301185	135128	864872
cfMBD06	205273	357677	301192	135858	864142
cfMBD07	201147	357582	304376	136895	863105
cfMBD08	422170	292931	198057	86842.5	913158
cfMBD12	480878	269710	173524	75888.3	924112
cfMBD16	603491	226008	119307	51194	948806
cfMBD17	586151	234025	125829	53994.8	946005
cfMBD18	592613	228259	125613	53514.3	946486
cfMBD19	563580	240673	136668	59078.3	940922
cfMBD20	471797	268875	179924	79403.7	920596
cfMBD21	331414	315429	243326	109831	890169
cfMBD22	459587	271073	186792	82547.6	917452
cfMBD23	551389	245206	142161	61244.5	938755
cfMBD24	599089	226694	121678	52538.9	947461
cfMBD25	612111	222018	116259	49611.8	950388
cfMBD26	603750	225289	119656	51304.9	948695
cfMBD27	609517	224096	116458	49929.7	950070
cfMBD28	510396	253173	164663	71768.5	928231
cfMBD29	315826	319759	251327	113087	886913
cfMBD30	428637	279803	201270	90289.3	909711
cfMBD31	607892	221403	119381	51323.9	948676
cfMBD38	273862	337861	268547	119729	880271
cfMBD39	292944	332935	259024	115098	884902
cfMBD40	221891	349379	295644	133086	866914
cfMBD41	218869	351500	297417	132214	867786
cfMBD44	167468	362332	323030	147169	852831
cfMBD45	180899	361357	315073	142671	857329
cfMBD46	363834	307841	228012	100314	899686
cfMBD47	438901	284091	192695	84313.3	915687
cfMBD48	164732	365945	322607	146716	853284
cfMBD49	174576	361567	318856	145001	854999
cfMBD51	370314	320578	215574	93534.1	906466
cfMBD52	361107	322374	219874	96645.3	903355
cfMBD53	461125	289573	174546	74755.5	925244
cfMBD54	466115	287429	172699	73756.9	926243
cfMBD55	505778	283283	148775	62164.4	937836
cfMBD56	516474	278431	145115	59979.1	940021
cfMBD57	422483	321276	180692	75548.6	924451
cfMBD58	446755	312994	170078	70173.5	929827
cfMBD61	204901	357606	301235	136258	863742
cfMBD62	209853	355644	299958	134545	865455
cfMBD63	387039	304966	214333	93662.1	906338
cfMBD64	392385	302718	211608	93288.8	906711
	Island_sum	Shore_sum	Shelf_sum	Inter_sum	Extended_sum
MBD5ng1	201334	351433	304584	142648	857352
MBD5ng2	198472	351790	306301	143437	856563
MBD10ng1	190485	354672	309431	145412	854588
MBD10ng2	200473	352902	304348	142277	857723
	Island_sum	Shore_sum	Shelf_sum	Inter_sum	Extended_sum
cfMeDIP01	396474	313022	202651	87852.7	912147
cfMeDIP02	380416	321686	208900	88999	911001
cfMeDIP03	426976	306588	186911	79524.9	920475
cfMeDIP04	410034	311384	194984	83598.7	916401
cfMeDIP05	371988	319869	215194	92948.5	907052
cfMeDIP06	413667	306121	195492	84719.8	915280
cfMeDIP07	375868	318672	212666	92793.6	907206
cfMeDIP08	414826	304386	196348	84439.7	915560
cfMeDIP09	415527	306620	194287	83565.4	916435
cfMeDIP10	382856	316989	209082	91072.3	908928
cfMeDIP11	365518	319580	218958	95944.3	904056
cfMeDIP12	346768	328934	225857	98439.8	901560
cfMeDIP13	361380	322722	220004	95893.5	904107
cfMeDIP14	428274	302951	187816	80959	919041
cfMeDIP15	375972	322159	210635	91233.5	908766
cfMeDIP16	425330	304577	188681	81412.3	918588
cfMeDIP17	401220	308756	202399	87624.8	912375
cfMeDIP18	383937	316074	209105	90884.3	909116
cfMeDIP19	374816	318644	214126	92413.3	907587
cfMeDIP20	378738	319081	210676	91504.9	908495
cfMeDIP21	361825	321828	219200	97146.2	902854
cfMeDIP22	372416	321979	212967	92637.1	907363
cfMeDIP23	401493	315389	198452	84666.7	915333
cfMeDIP24	366393	321085	217458	95063.7	904936

## Sheet: logistic regression model
Name	Length	cfMBD-seq normalized counts	450K average beta value	450k Methylation
chr1:135125~135563	438	70.9928	0.81471	1
chr1:533220~534114	894	218.68	0.920543	1
chr1:713985~714547	562	0.674613	0.0895596	0
chr1:788864~789211	347	71.3376	0.918858	1
chr1:805199~805628	429	2.3529	0.349453	0
chr1:839695~840619	924	1.89797	0.149221	0
chr1:854766~854973	207	59.9178	0.886644	1
chr1:886357~886602	245	86.2022	0.921364	1
chr1:906297~906538	241	2.66787	0.453981	0
chr1:919727~919927	200	1.21124	0.438327	0
chr1:948671~948894	223	0.315269	0.0972351	0
chr1:949330~949851	521	26.68	0.78464	1
chr1:963796~964507	711	56.6445	0.914024	1
chr1:981069~981400	331	60.9095	0.8548	1
chr1:982153~982511	358	75.8288	0.883814	1
chr1:983175~983612	437	37.8387	0.87637	1
chr1:984207~984429	222	69.5753	0.887207	1
chr1:990275~990694	419	46.9045	0.883493	1
chr1:994437~995303	866	0.219976	0.0729042	0
chr1:999679~999911	232	0.771514	0.0708773	0
chr1:1016864~1017439	575	63.8774	0.907539	1
chr1:1018100~1018390	290	136.971	0.954612	1
chr1:1019819~1020026	207	60.7054	0.90487	1
chr1:1023144~1023347	203	83.5102	0.957735	1
chr1:1024076~1024614	538	84.6973	0.907777	1
chr1:1026378~1026625	247	73.2995	0.927087	1
chr1:1027510~1027730	220	99.2819	0.941325	1
chr1:1046045~1046340	295	57.7327	0.916602	1
chr1:1050516~1050830	314	1.26796	0.168282	0
chr1:1072370~1072847	477	11.0154	0.0859622	0
chr1:1093212~1093476	264	1.32875	0.110132	0
chr1:1109315~1110145	830	31.0165	0.608851	1
chr1:1115575~1116006	431	74.8795	0.934846	1
chr1:1132828~1133218	390	114.136	0.907196	1
chr1:1136361~1137156	795	0.357952	0.0691392	0
chr1:1141671~1142150	479	1.06164	0.0822735	0
chr1:1145569~1145878	309	112.146	0.873913	1
chr1:1146709~1146914	205	78.2518	0.878368	1
chr1:1149056~1149524	468	5.17226	0.158085	0
chr1:1152523~1153134	611	105.939	0.817198	1
chr1:1153785~1154419	634	63.4686	0.892056	1
chr1:1159169~1159528	359	60.9453	0.930193	1
chr1:1161960~1162281	321	46.6643	0.953463	1
chr1:1163503~1163895	392	66.6235	0.949499	1
chr1:1173916~1174263	347	25.3242	0.826827	1
chr1:1177886~1178207	321	113.18	0.834351	1
chr1:1181757~1182470	713	1.84667	0.224046	0
chr1:1189397~1190245	848	91.4136	0.827981	1
chr1:1190523~1190799	276	70.9762	0.905249	1
chr1:1203167~1203597	430	63.3995	0.929396	1
chr1:1247919~1248493	574	61.5218	0.858437	1
chr1:1254323~1254548	225	49.8998	0.937959	1
chr1:1259644~1260635	991	0.259589	0.0562734	0
chr1:1262666~1263420	754	80.0696	0.909561	1
chr1:1265207~1265429	222	66.1523	0.910875	1
chr1:1267086~1267286	200	41.4868	0.880297	1
chr1:1271426~1272074	648	71.7838	0.92706	1
chr1:1272378~1272634	256	79.3928	0.928117	1
chr1:1322645~1322924	279	112.053	0.935114	1
chr1:1342005~1342952	947	0.315497	0.0654773	0
chr1:1355160~1356000	840	9.09355	0.77409	1
chr1:1361561~1361787	226	13.5962	0.609405	1
chr1:1362955~1363299	344	0.44486	0.031567	0
chr1:1370768~1371449	681	0.270333	0.138358	0
chr1:1389556~1389889	333	65.3709	0.835469	1
chr1:1396086~1396338	252	16.4732	0.449411	0
chr1:1406845~1407821	976	0.343881	0.0470022	0
chr1:1417286~1417753	467	95.8089	0.92626	1
chr1:1420227~1420684	457	61.8902	0.851335	1
chr1:1455303~1455892	589	90.2187	0.908075	1
chr1:1456830~1457074	244	78.644	0.978071	1
chr1:1464509~1464806	297	88.4006	0.789022	1
chr1:1470605~1471450	845	90.9957	0.880483	1
chr1:1473108~1473342	234	117.829	0.912007	1
chr1:1474963~1475220	257	8.70127	0.280499	0
chr1:1476094~1476669	575	23.5388	0.727854	1
chr1:1489533~1489794	261	77.7457	0.905375	1
chr1:1496762~1496986	224	55.4182	0.900433	1
chr1:1558588~1559359	771	91.0725	0.879531	1
chr1:1560781~1561055	274	55.5759	0.882142	1
chr1:1562050~1562398	348	70.6094	0.889859	1
chr1:1590074~1590942	868	0.495713	0.0645579	0
chr1:1600982~1601231	249	95.5384	0.946845	1
chr1:1602392~1602686	294	49.366	0.926139	1
chr1:1655396~1656231	835	0.468755	0.0999539	0
chr1:1685374~1685971	597	74.5428	0.918692	1
chr1:1691768~1692063	295	38.0235	0.923085	1
chr1:1713640~1714141	501	1.40053	0.471548	0
chr1:1839959~1840601	642	0.527753	0.221276	0
chr1:1859247~1859523	276	55.3457	0.906638	1
chr1:1874716~1875015	299	77.9665	0.870878	1
chr1:1875618~1875877	259	1.09793	0.408725	0
chr1:1886345~1886870	525	57.9961	0.76896	1
chr1:1896415~1896628	213	71.6295	0.820303	1
chr1:1897582~1897786	204	49.0366	0.720489	1
chr1:1935167~1935452	285	1.60762	0.107229	0
chr1:1957047~1957386	339	56.957	0.61656	1
chr1:1959415~1959867	452	84.1649	0.867565	1
chr1:1960943~1961148	205	49.0658	0.849432	1
chr1:1961408~1961850	442	76.9179	0.883967	1
chr1:1974687~1974942	255	50.6338	0.835942	1
chr1:1976124~1976628	504	0.663762	0.131867	0
chr1:1990780~1991171	391	82.6819	0.915848	1
chr1:2005180~2005565	385	129.422	0.920305	1
chr1:2038556~2038863	307	55.6348	0.806445	1
chr1:2040998~2041302	304	76.4787	0.932658	1
chr1:2046430~2046865	435	88.4498	0.764048	1
chr1:2063783~2064052	269	37.6037	0.59273	1
chr1:2064629~2064855	226	4.12934	0.0806496	0
chr1:2066368~2066666	298	77.8738	0.891479	1
chr1:2082315~2082529	214	56.4781	0.637995	1
chr1:2116433~2116801	368	97.867	0.915187	1
chr1:2121018~2121818	800	17.4504	0.556216	1
chr1:2126049~2126642	593	0.469051	0.0555928	0
chr1:2136809~2137351	542	2.99385	0.240489	0
chr1:2144200~2144497	297	5.05362	0.0719114	0
chr1:2222199~2222569	370	1.53984	0.0596513	0
chr1:2232311~2232617	306	9.67095	0.0802816	0
chr1:2235309~2235667	358	68.0962	0.921758	1
chr1:2249316~2249634	318	118.94	0.983867	1
chr1:2258098~2258423	325	37.9379	0.908619	1
chr1:2259065~2259326	261	95.1485	0.89142	1
chr1:2266008~2266432	424	63.2859	0.862102	1
chr1:2276359~2276657	298	101.796	0.938158	1
chr1:2304160~2304376	216	74.8427	0.837509	1
chr1:2316354~2316749	395	76.6373	0.882133	1
chr1:2333551~2334172	621	46.7998	0.934766	1
chr1:2339877~2340246	369	32.7967	0.857486	1
chr1:2345892~2346156	264	0.984118	0.0726799	0
chr1:2359927~2360167	240	140.331	0.898461	1
chr1:2371847~2372073	226	372.913	0.900864	1
chr1:2374819~2375814	995	3.52042	0.164299	0
chr1:2387670~2388086	416	44.6141	0.783773	1
chr1:2398826~2399055	229	1.19066	0.233568	0
chr1:2409758~2410049	291	62.2619	0.761902	1
chr1:2411126~2411404	278	71.5156	0.891508	1
chr1:2415199~2415506	307	45.6763	0.811162	1
chr1:2433649~2434065	416	117.038	0.806774	1
chr1:2435042~2435257	215	41.727	0.889641	1
chr1:2435555~2435828	273	64.7873	0.727486	1
chr1:2439798~2440022	224	67.3766	0.916323	1
chr1:2440127~2440478	351	78.1651	0.963223	1
chr1:2445356~2445648	292	71.8062	0.908357	1
chr1:2449923~2450206	283	62.9889	0.888103	1
chr1:2451218~2451551	333	73.645	0.927694	1
chr1:2452796~2453007	211	23.2448	0.953683	1
chr1:2466935~2467212	277	21.007	0.786913	1
chr1:2472096~2472586	490	1.32087	0.283857	0
chr1:2477564~2478363	799	0.165701	0.0721417	0
chr1:2527240~2527503	263	90.6936	0.899808	1
chr1:2537672~2537886	214	56.5744	0.930344	1
chr1:2574031~2574864	833	0.390683	0.101834	0
chr1:2706026~2706961	935	2.55621	0.335695	0
chr1:2716742~2717233	491	78.4274	0.909604	1
chr1:2772127~2772665	538	53.8129	0.83248	1
chr1:2777158~2777361	203	94.472	0.882661	1
chr1:2827786~2828294	508	52.2556	0.897691	1
chr1:2847057~2847288	231	74.164	0.926561	1
chr1:2850666~2850873	207	69.2172	0.897047	1
chr1:2876546~2876808	262	21.97	0.727752	1
chr1:2885063~2885284	221	12.0345	0.587483	1
chr1:2886590~2886923	333	47.7216	0.796273	1
chr1:2918498~2918753	255	117.273	0.887693	1
chr1:2929156~2929376	220	0.482858	0.209366	0
chr1:2938634~2939043	409	80.0606	0.881539	1
chr1:2990031~2990718	687	3.40958	0.31337	0
chr1:2997273~2997473	200	75.1123	0.911443	1
chr1:2999728~2999978	250	52.8656	0.91239	1
chr1:3028180~3028557	377	34.1133	0.895903	1
chr1:3038068~3038343	275	55.9795	0.825103	1
chr1:3056542~3056772	230	62.9784	0.865568	1
chr1:3059051~3059268	217	38.0374	0.791291	1
chr1:3071900~3072239	339	13.2345	0.467588	0
chr1:3080935~3081292	357	59.7515	0.894403	1
chr1:3102541~3103352	811	56.4249	0.909459	1
chr1:3104957~3105253	296	31.9575	0.626779	1
chr1:3111580~3111909	329	99.4177	0.839123	1
chr1:3147846~3148081	235	70.6929	0.922351	1
chr1:3155161~3155361	200	121.485	0.878295	1
chr1:3157510~3158300	790	77.6651	0.878937	1
chr1:3163970~3164643	673	1.90714	0.392215	0
chr1:3182822~3183216	394	58.7545	0.924721	1
chr1:3184547~3184824	277	97.8059	0.931128	1
chr1:3195377~3196052	675	59.0917	0.852568	1
chr1:3203766~3204453	687	124.029	0.87448	1
chr1:3239916~3240261	345	3.05709	0.390351	0
chr1:3275030~3275284	254	52.8466	0.930768	1
chr1:3307070~3307285	215	45.6727	0.909507	1
chr1:3310103~3311035	932	4.13781	0.299277	0
chr1:3331041~3331279	238	57.8404	0.894389	1
chr1:3331987~3332227	240	55.7159	0.888082	1
chr1:3342013~3342806	793	53.9737	0.921136	1
chr1:3351366~3351632	266	87.2621	0.92475	1
chr1:3370906~3371683	777	0.0888289	0.108537	0
chr1:3394702~3395191	489	47.8374	0.849588	1
chr1:3425577~3425797	220	92.4133	0.860572	1
chr1:3426362~3426570	208	89.108	0.954732	1
chr1:3427356~3427683	327	81.2595	0.837244	1
chr1:3435989~3436250	261	74.8448	0.869082	1
chr1:3447450~3447950	500	0.528676	0.065466	0
chr1:3459875~3460269	394	64.2804	0.897425	1
chr1:3499903~3500470	567	94.1964	0.929237	1
chr1:3511710~3512118	408	73.497	0.886113	1
chr1:3527620~3528078	458	0.264079	0.0539014	0
chr1:3528334~3528683	349	0.986469	0.174001	0
chr1:3556964~3557201	237	40.0021	0.752982	1
chr1:3607097~3607553	456	85.4681	0.891465	1
chr1:3623319~3623521	202	44.2266	0.797692	1
chr1:3634634~3635101	467	10.7258	0.505383	1
chr1:3649295~3649674	379	33.1003	0.526558	1
chr1:3703673~3703908	235	54.7681	0.812964	1
chr1:3712399~3713234	835	0.648368	0.0974577	0
chr1:3731459~3732015	556	26.7472	0.935279	1
chr1:3775078~3775369	291	26.843	0.876112	1
chr1:3790865~3791611	746	37.2506	0.922598	1
chr1:3824220~3824456	236	16.5532	0.90218	1
chr1:4192634~4193243	609	60.0718	0.869691	1
chr1:4221388~4221672	284	83	0.93081	1
chr1:4726577~4726867	290	100.068	0.664493	1
chr1:4771653~4772545	892	62.2194	0.626858	1
chr1:4832352~4832553	201	100.022	0.931661	1
chr1:5772057~5772513	456	106.563	0.975053	1
chr1:5793558~5793784	226	37.8915	0.875624	1
chr1:5937158~5937392	234	79.2354	0.919428	1
chr1:5950825~5951029	204	53.7002	0.931925	1
chr1:6086245~6086494	249	1.43517	0.0789204	0
chr1:6111610~6111836	226	81.4848	0.863587	1
chr1:6131636~6131985	349	82.1268	0.907305	1
chr1:6187744~6188235	491	6.36657	0.329642	0
chr1:6188874~6189120	246	114.984	0.93308	1
chr1:6202119~6202359	240	81.174	0.901868	1
chr1:6208717~6209039	322	0.674444	0.162797	0
chr1:6241032~6241251	219	0.307452	0.121882	0
chr1:6259179~6259883	704	0.479669	0.064103	0
chr1:6265826~6266778	952	0.424239	0.117851	0
chr1:6268821~6269588	767	18.9561	0.166556	0
chr1:6295529~6296261	732	0.50601	0.0553602	0
chr1:6309164~6310092	928	1.44523	0.121319	0
chr1:6313762~6314139	377	90.8774	0.904869	1
chr1:6320138~6320942	804	0.167439	0.0697543	0
chr1:6339949~6340268	319	38.75	0.919896	1
chr1:6341137~6341412	275	46.0043	0.918505	1
chr1:6484504~6485327	823	0.431795	0.216554	0
chr1:6500169~6501130	961	1.57091	0.205816	0
chr1:6511690~6512110	420	55.8335	0.681813	1
chr1:6525997~6526228	231	4.87527	0.113734	0
chr1:6545144~6545559	415	0.828679	0.240236	0
chr1:6557562~6557872	310	0.240016	0.0481721	0
chr1:6614137~6614835	698	0.249685	0.0607773	0
chr1:6639428~6640361	933	1.6567	0.213133	0
chr1:6653398~6653674	276	64.0624	0.915403	1
chr1:6659126~6659505	379	30.9686	0.756973	1
chr1:6685072~6685691	619	1.26189	0.0634974	0
chr1:6761296~6762131	835	0.924396	0.0816287	0
chr1:7022002~7022308	306	3.54816	0.323295	0
chr1:7122520~7122727	207	43.6287	0.899002	1
chr1:7740144~7741117	973	0.36678	0.0621905	0
chr1:7831379~7831846	467	0.138721	0.0805601	0
chr1:7843461~7843693	232	0.622494	0.125254	0
chr1:7887199~7887476	277	64.1381	0.687141	1
chr1:8002409~8002699	290	0.25508	0.0667562	0
chr1:8013994~8014651	657	0.581002	0.0851337	0
chr1:8021302~8022226	924	0.362412	0.07522	0
chr1:8271997~8272202	205	3.0539	0.337776	0
chr1:8277196~8277822	626	0.427909	0.125353	0
chr1:8377785~8378447	662	2.97399	0.327384	0
chr1:8384388~8384719	331	54.0915	0.892827	1
chr1:8385896~8386168	272	78.3115	0.924386	1
chr1:8390203~8390800	597	96.8538	0.926182	1
chr1:8395344~8395635	291	61.356	0.916252	1
chr1:8403698~8404102	404	52.0754	0.86676	1
chr1:8418323~8418857	534	73.5344	0.927019	1
chr1:8483390~8484339	949	0.217298	0.0737774	0
chr1:8763006~8763549	543	0.272244	0.0442021	0
chr1:8877013~8877283	270	0.398591	0.105447	0
chr1:8877599~8878092	493	0.221719	0.0327984	0
chr1:9131603~9131909	306	106.899	0.882138	1
chr1:9258566~9258956	390	3.28194	0.177607	0
chr1:9294402~9295118	716	0.0444962	0.0995153	0
chr1:9324203~9324439	236	62.3542	0.938197	1
chr1:9324688~9325016	328	46.9779	0.884593	1
chr1:9416127~9416404	277	76.9569	0.944673	1
chr1:9427508~9427734	226	55.2468	0.968849	1
chr1:9488938~9489249	311	0.217933	0.103257	0
chr1:9555380~9555652	272	1.18033	0.102354	0
chr1:9648587~9649517	930	0.219049	0.0925854	0
chr1:9670618~9670868	250	64.2147	0.917942	1
chr1:9687126~9687367	241	0.874916	0.11118	0
chr1:9749296~9750228	932	3.47922	0.422518	0
chr1:9775709~9775997	288	69.5914	0.635671	1
chr1:9790293~9790704	411	37.9573	0.873616	1
chr1:9791159~9791486	327	66.809	0.883104	1
chr1:9822577~9822817	240	124.345	0.938005	1
chr1:9969846~9970063	217	0.739974	0.0436852	0
chr1:9970585~9970790	205	0	0.0522863	0
chr1:10003166~10003585	419	0.171017	0.0742316	0
chr1:10057122~10058108	986	0.677081	0.0857429	0
chr1:10092533~10093404	871	0.491056	0.0785554	0
chr1:10386184~10386390	206	42.5865	0.927795	1
chr1:10490201~10491072	871	0.528491	0.0949543	0
chr1:10532178~10532800	622	0.281283	0.0813597	0
chr1:10534919~10535172	253	0.420124	0.0499919	0
chr1:10698300~10698910	610	24.3632	0.392614	0
chr1:10699395~10700098	703	110.121	0.944726	1
chr1:10702137~10702340	203	60.7651	0.941954	1
chr1:10707811~10708140	329	76.4295	0.937346	1
chr1:10713839~10714203	364	72.879	0.933464	1
chr1:10714402~10714708	306	83.6133	0.9173	1
chr1:10719868~10720581	713	67.714	0.926217	1
chr1:10725188~10725617	429	96.2418	0.922506	1
chr1:10753774~10754176	402	0.351586	0.0477612	0
chr1:10755227~10755521	294	1.65256	0.121536	0
chr1:10757892~10758252	360	63.4123	0.941783	1
chr1:10764450~10764925	475	64.2232	0.764405	1
chr1:10895896~10896117	221	8.64066	0.250669	0
chr1:11072320~11073245	925	0.334624	0.0820256	0
chr1:11159388~11160136	748	0.492708	0.062149	0
chr1:11322259~11323036	777	0.224739	0.0728641	0
chr1:11333260~11333547	287	0.497844	0.0949754	0
chr1:11561367~11562156	789	54.4369	0.586267	1
chr1:11589839~11590044	205	118.437	0.879982	1
chr1:11596383~11596622	239	92.11	0.889619	1
chr1:11708768~11709277	509	7.37554	0.327372	0
chr1:11710460~11710788	328	0.881309	0.093342	0
chr1:11724114~11724885	771	0.312588	0.0641223	0
chr1:11740829~11741717	888	0.206918	0.0572601	0
chr1:11779567~11780016	449	0.433429	0.0548937	0
chr1:11795976~11796263	287	1.06774	0.145245	0
chr1:11822140~11822363	223	1.14941	0.198959	0
chr1:11898394~11898732	338	38.9058	0.779788	1
chr1:11919116~11919555	439	0.683318	0.0756734	0
chr1:11985644~11986634	990	9.22799	0.422036	0
chr1:11994695~11994969	274	0.767188	0.0467626	0
chr1:12040114~12040793	679	0.320806	0.0638725	0
chr1:12079252~12079903	651	0.284821	0.0803752	0
chr1:12123489~12124148	659	0.75228	0.13394	0
chr1:12226877~12227712	835	0.551042	0.0416345	0
chr1:12251778~12251985	207	81.0895	0.911328	1
chr1:12289955~12290585	630	0.228383	0.0646852	0
chr1:12290956~12291199	243	0	0.210457	0
chr1:12600348~12600556	208	19.449	0.780781	1
chr1:12655927~12656248	321	1.53872	0.384688	0
chr1:13881411~13881612	201	125.913	0.933701	1
chr1:13909607~13909842	235	4.56164	0.337333	0
chr1:13910138~13910868	730	0.611094	0.104693	0
chr1:14026482~14027200	718	0.71385	0.0354637	0
chr1:14219351~14219737	386	0.747325	0.153734	0
chr1:15127584~15127869	285	31.3109	0.80246	1
chr1:15375064~15375413	349	25.5921	0.874991	1
chr1:15541182~15541447	265	46.8066	0.891579	1
chr1:15573621~15573953	332	0.418929	0.162536	0
chr1:15850494~15850699	205	0.842708	0.0530218	0
chr1:15851107~15851581	474	0.0695106	0.0639203	0
chr1:15853109~15853663	554	0.407061	0.0668804	0
chr1:15911089~15911608	519	1.34643	0.0567585	0
chr1:15929824~15930289	465	0.0806924	0.0704072	0
chr1:15943822~15944356	534	0.414818	0.0758183	0
chr1:16011267~16011502	235	0.672945	0.106244	0
chr1:16053617~16053975	358	82.0911	0.923404	1
chr1:16058298~16058505	207	64.4993	0.955552	1
chr1:16070629~16070853	224	36.035	0.833174	1
chr1:16073319~16073521	202	43.2679	0.9042	1
chr1:16085148~16085862	714	0.851206	0.0642106	0
chr1:16163753~16164123	370	6.88655	0.292579	0
chr1:16175830~16176117	287	0.336198	0.109335	0
chr1:16260871~16261155	284	59.7947	0.901085	1
chr1:16269901~16270259	358	53.6679	0.945755	1
chr1:16270592~16271582	990	95.1126	0.897271	1
chr1:16301903~16302672	769	0.54943	0.0475325	0
chr1:16399649~16400072	423	0.241802	0.157859	0
chr1:16464377~16464621	244	97.8314	0.904623	1
chr1:16475112~16475324	212	93.3527	0.865372	1
chr1:16494062~16494505	443	0.689493	0.0602782	0
chr1:16543684~16544307	623	0.484665	0.188344	0
chr1:16553327~16553660	333	2.7486	0.257229	0
chr1:16563545~16563799	254	0.438552	0.0199024	0
chr1:16678575~16679192	617	0.387756	0.0650532	0
chr1:16693622~16694270	648	0.444193	0.0870184	0
chr1:16766999~16767803	804	0.492411	0.0653223	0
chr1:16810606~16810957	351	105.666	0.912825	1
chr1:16847281~16847892	611	6.05252	0.564277	1
chr1:16939457~16940454	997	1.54612	0.0759388	0
chr1:16970856~16971492	636	1.64215	0.0751998	0
chr1:17022987~17023284	297	81.9527	0.487559	0
chr1:17033769~17034728	959	3.66825	0.13375	0
chr1:17051492~17051891	399	190.026	0.863754	1
chr1:17186112~17186523	411	108.305	0.77576	1
chr1:17197562~17197849	287	188.563	0.764685	1
chr1:17215422~17216094	672	4.98374	0.195534	0
chr1:17222228~17222466	238	1.13146	0.0965633	0
chr1:17231299~17231680	381	0.570633	0.124482	0
chr1:17240039~17240970	931	0.420174	0.169917	0
chr1:17281819~17282056	237	74.1387	0.921211	1
chr1:17287291~17287684	393	3.34201	0.354858	0
chr1:17292905~17293115	210	83.2564	0.86268	1
chr1:17306552~17307363	811	0.337337	0.080636	0
chr1:17331886~17332093	207	29.3544	0.915659	1
chr1:17337830~17338590	760	0.33447	0.0719319	0
chr1:17380457~17380722	265	0.239878	0.0359419	0
chr1:17445652~17446088	436	0.518107	0.0746672	0
chr1:17475703~17476075	372	26.6501	0.50722	1
chr1:17734436~17734645	209	58.4249	0.848803	1
chr1:17746201~17746547	346	5.30523	0.408137	0
chr1:17865864~17866630	766	0.339688	0.155455	0
chr1:17949453~17949670	217	68.4213	0.825581	1
chr1:18023482~18023792	310	97.6277	0.982028	1
chr1:18152379~18152842	463	15.0125	0.542177	1
chr1:18434106~18434813	707	0.325565	0.143654	0
chr1:18435567~18435904	337	0.841225	0.17036	0
chr1:18691875~18692081	206	80.5361	0.823271	1
chr1:18703296~18703496	200	91.1541	0.839167	1
chr1:18808874~18809667	793	109.315	0.882061	1
chr1:18962843~18963481	638	1.1273	0.0945639	0
chr1:18964181~18964401	220	1.16736	0.263229	0
chr1:18967252~18968119	867	0.656666	0.125401	0
chr1:18971730~18972097	367	0.619469	0.0956286	0
chr1:18973029~18973304	275	1.22644	0.0992594	0
chr1:19043391~19043828	437	0.485165	0.145937	0
chr1:19110721~19110932	211	48.7492	0.700599	1
chr1:19180946~19181469	523	70.0478	0.824991	1
chr1:19203875~19204234	359	84.0394	0.94129	1
chr1:19209627~19209914	287	57.3761	0.916225	1
chr1:19228829~19229634	805	0.387477	0.0807778	0
chr1:19536152~19537046	894	0.604102	0.0632955	0
chr1:19577885~19578708	823	0.519518	0.0674956	0
chr1:19600250~19600942	692	6.23716	0.257302	0
chr1:19614999~19615660	661	4.91261	0.23314	0
chr1:19665011~19665276	265	52.5029	0.866542	1
chr1:19811704~19812644	940	0.073442	0.0672884	0
chr1:19923342~19924002	660	0.530632	0.0626596	0
chr1:20005511~20005865	354	113.439	0.903664	1
chr1:20126030~20126780	750	0.281872	0.0691227	0
chr1:20208808~20209462	654	0.431609	0.0756195	0
chr1:20512361~20512797	436	0.736369	0.0892114	0
chr1:20569456~20569817	361	79.7606	0.788576	1
chr1:20669567~20670018	451	2.26887	0.158494	0
chr1:20692583~20693534	951	0.814668	0.172175	0
chr1:20834417~20834883	466	0.407953	0.0685768	0
chr1:20960046~20960551	505	0.200415	0.0858724	0
chr1:20987517~20988238	721	0.106712	0.0574626	0
chr1:21022940~21023189	249	0.711688	0.101747	0
chr1:21031009~21031369	360	101.26	0.941549	1
chr1:21043833~21044771	938	3.60848	0.102669	0
chr1:21503116~21503836	720	0.611124	0.0535313	0
chr1:21551575~21551931	356	77.5844	0.907732	1
chr1:21616381~21617101	720	5.61283	0.0530033	0
chr1:21671361~21672319	958	0.617168	0.112077	0
chr1:21763071~21763416	345	1.99186	0.307309	0
chr1:21766273~21767224	951	0.698391	0.114464	0
chr1:21786446~21786713	267	45.2332	0.64245	1
chr1:21835549~21836344	795	0.372513	0.119102	0
chr1:21930180~21930380	200	66.4284	0.91907	1
chr1:21948675~21949263	588	5.14213	0.272498	0
chr1:21978102~21978764	662	0.518772	0.0966036	0
chr1:21985704~21986102	398	0.631968	0.0969028	0
chr1:21995064~21995914	850	0.822804	0.0659549	0
chr1:21996162~21996409	247	0.742561	0.0709765	0
chr1:22140892~22141407	515	10.1397	0.491677	0
chr1:22149684~22149897	213	82.8569	0.856107	1
chr1:22155301~22155565	264	69.0275	0.861162	1
chr1:22191350~22191592	242	86.1505	0.784978	1
chr1:22210993~22211318	325	93.067	0.909774	1
chr1:22213903~22214119	216	55.1504	0.926865	1
chr1:22351918~22352194	276	0.244186	0.116385	0
chr1:22446521~22446943	422	76.9639	0.93367	1
chr1:22456024~22456225	201	40.9512	0.751297	1
chr1:22612215~22612418	203	53.8183	0.86999	1
chr1:22668639~22668862	223	2.2156	0.119957	0
chr1:22778237~22778817	580	0.586021	0.0439349	0
chr1:22889596~22890096	500	0.434262	0.16731	0
chr1:22902803~22903413	610	61.622	0.864176	1
chr1:22919774~22920207	433	26.3076	0.557016	1
chr1:22927146~22927542	396	30.3608	0.694879	1
chr1:22974051~22974303	252	42.0608	0.852953	1
chr1:23003417~23003831	414	48.4734	0.804775	1
chr1:23110905~23111567	662	71.6972	0.869211	1
chr1:23345815~23346677	862	0.35756	0.0879319	0
chr1:23504060~23504633	573	0.928696	0.152652	0
chr1:23543378~23544237	859	0.318598	0.031641	0
chr1:23763155~23763971	816	40.384	0.715943	1
chr1:23809978~23810693	715	0.357268	0.0666487	0
chr1:23881018~23881755	737	0.392196	0.136776	0
chr1:23884843~23885087	244	0.830097	0.114722	0
chr1:23885683~23886212	529	0.250115	0.0723293	0
chr1:23894641~23895064	423	0.443629	0.0643135	0
chr1:23945942~23946295	353	0.305714	0.0456464	0
chr1:24018356~24018567	211	1.16205	0.0915288	0
chr1:24069696~24070615	919	0.165999	0.083273	0
chr1:24104503~24105263	760	0.184862	0.0581513	0
chr1:24117483~24117824	341	0.324082	0.0660129	0
chr1:24126800~24127549	749	0.32311	0.046092	0
chr1:24194255~24194990	735	0.397322	0.0928251	0
chr1:24229116~24229537	421	9.65488	0.325722	0
chr1:24285786~24286701	915	0.921463	0.0575116	0
chr1:24306364~24307017	653	0	0.0474409	0
chr1:24513541~24514477	936	0.970616	0.146457	0
chr1:24648203~24648985	782	0.334449	0.139755	0
chr1:24739858~24740262	404	0.706266	0.0854461	0
chr1:24742672~24743039	367	0.902206	0.176995	0
chr1:24861703~24861920	217	12.9015	0.401671	0
chr1:25174561~25175367	806	0.574115	0.0534317	0
chr1:25228497~25229132	635	81.4901	0.912551	1
chr1:25234429~25234807	378	101.41	0.903839	1
chr1:25558564~25559178	614	0.124409	0.0647182	0
chr1:25566460~25566711	251	0.457074	0.0852634	0
chr1:25593958~25594487	529	0.539963	0.172947	0
chr1:25942662~25943191	529	0.19059	0.0690379	0
chr1:25944100~25944772	672	6.43178	0.189526	0
chr1:26097905~26098107	202	2.02494	0.4105	0
chr1:26185473~26186356	883	0.559276	0.073628	0
chr1:26201723~26202516	793	0.364478	0.0642068	0
chr1:26249206~26249613	407	0.744793	0.070753	0
chr1:26324550~26324934	384	0.333033	0.0813971	0
chr1:26487808~26488606	798	0.823324	0.303063	0
chr1:26490523~26491015	492	1.04883	0.286038	0
chr1:26496180~26496824	644	0.351796	0.0533011	0
chr1:26551518~26552194	676	1.48619	0.212779	0
chr1:26560450~26561028	578	0.124054	0.0738159	0
chr1:26606363~26606913	550	0.128167	0.0604323	0
chr1:26632837~26633316	479	0.410758	0.0579353	0
chr1:26662539~26663466	927	0.667604	0.163918	0
chr1:26672446~26672650	204	71.8376	0.935244	1
chr1:26686517~26687281	764	5.06676	0.0979861	0
chr1:26737247~26738148	901	0.691665	0.177249	0
chr1:26758493~26758856	363	0.698782	0.0303275	0
chr1:26826677~26827474	797	0.491432	0.0712869	0
chr1:26856192~26856684	492	0.675908	0.104307	0
chr1:27114119~27114692	573	0.387128	0.0826813	0
chr1:27143741~27143953	212	115.744	0.903372	1
chr1:27189913~27190128	215	103.37	0.933473	1
chr1:27191067~27191911	844	0.256156	0.0772531	0
chr1:27216162~27217045	883	0.432347	0.0476018	0
chr1:27226493~27227009	516	0.125573	0.0827373	0
chr1:27248049~27248619	570	0.364201	0.0513364	0
chr1:27332594~27332982	388	103.362	0.934815	1
chr1:27338880~27339441	561	2.92852	0.134657	0
chr1:27481346~27481742	396	0.275893	0.0691932	0
chr1:27527885~27528085	200	91.8191	0.660372	1
chr1:27648454~27649006	552	0.230769	0.0491198	0
chr1:27683278~27683590	312	29.3505	0.715236	1
chr1:27687025~27687743	718	12.5109	0.404562	0
chr1:27692413~27693243	830	0.24519	0.0721514	0
chr1:27709601~27709831	230	1.85955	0.31826	0
chr1:27718893~27719349	456	0.505856	0.0535056	0
chr1:27816343~27816853	510	0.76311	0.0953864	0
chr1:27854417~27854963	546	0.31054	0.179303	0
chr1:27874418~27874638	220	56.3614	0.909347	1
chr1:27894928~27895524	596	0.49761	0.219096	0
chr1:27941866~27942324	458	80.3773	0.924873	1
chr1:27960568~27961023	455	0.46044	0.0490118	0
chr1:27961560~27961810	250	5.74859	0.526034	1
chr1:27986306~27986808	502	0.49419	0.0796404	0
chr1:27994728~27995031	303	93.4604	0.908048	1
chr1:28052146~28053002	856	0.468562	0.0607859	0
chr1:28099629~28100031	402	0	0.064627	0
chr1:28157222~28157788	566	0.259631	0.075931	0
chr1:28199032~28199257	225	1.10411	0.0530295	0
chr1:28240585~28241535	950	0.545533	0.0670959	0
chr1:28285021~28285304	283	40.923	0.929962	1
chr1:28286020~28286838	818	0.706369	0.0998401	0
chr1:28415099~28415312	213	0.175713	0.0668112	0
chr1:28559146~28559597	451	0.238191	0.0735608	0
chr1:28562511~28562976	465	0.541136	0.0800092	0
chr1:28573702~28574022	320	0.237612	0.0906219	0
chr1:28655366~28655667	301	1.2129	0.0674808	0
chr1:28696042~28696731	689	0.45296	0.04883	0
chr1:28844654~28845293	639	0.334959	0.0586239	0
chr1:28857038~28857311	273	94.5552	0.891629	1
chr1:28879403~28879704	301	0.460632	0.063988	0
chr1:28908070~28908799	729	0.163974	0.0638641	0
chr1:28919042~28919454	412	5.73841	0.279109	0
chr1:28969554~28969898	344	0.457501	0.0740563	0
chr1:29101791~29102069	278	0.38553	0.126752	0
chr1:29138502~29139348	846	0.844521	0.085504	0
chr1:29189308~29189952	644	102.646	0.862743	1
chr1:29213439~29214300	861	0.247999	0.0607657	0
chr1:29460811~29461172	361	69.8957	0.616283	1
chr1:29507977~29508686	709	0.195985	0.0598051	0
chr1:29557221~29557627	406	0.91487	0.0775803	0
chr1:29585898~29586598	700	0.821893	0.0548717	0
chr1:29587088~29587412	324	14.003	0.345525	0
chr1:29804963~29805239	276	0.684721	0.240752	0
chr1:31158010~31158261	251	0.861401	0.189786	0
chr1:31190973~31191221	248	0.312523	0.0752773	0
chr1:31191575~31191960	385	0.133953	0.0449029	0
chr1:31194277~31194587	310	41.9398	0.94785	1
chr1:31246011~31246280	269	104.548	0.829368	1
chr1:31280122~31280512	390	29.0836	0.596243	1
chr1:31380845~31381078	233	0.569718	0.0960815	0
chr1:31381539~31381966	427	0.551339	0.160663	0
chr1:31538413~31538938	525	0.288998	0.0770924	0
chr1:31628101~31628493	392	0.0990055	0.0329363	0
chr1:31654423~31654833	410	4.8497	0.248887	0
chr1:31712079~31712812	733	0.463523	0.041975	0
chr1:31769247~31769978	731	0.146511	0.106203	0
chr1:32052472~32052771	299	79.7396	0.788556	1
chr1:32054342~32054843	501	10.691	0.530752	1
chr1:32083150~32084069	919	1.13827	0.237228	0
chr1:32110211~32110961	750	0.357752	0.0772217	0
chr1:32169538~32169869	331	1.78372	0.337298	0
chr1:32180132~32180487	355	0.412013	0.118033	0
chr1:32208487~32208704	217	94.612	0.914485	1
chr1:32221888~32222107	219	64.8776	0.665902	1
chr1:32226147~32226535	388	1.31217	0.103162	0
chr1:32237828~32238661	833	1.60911	0.204008	0
chr1:32254005~32254353	348	0.635334	0.0830789	0
chr1:32403388~32404382	994	0.140248	0.0924099	0
chr1:32410189~32410630	441	1.68953	0.0970408	0
chr1:32538206~32539052	846	0.467136	0.0845884	0
chr1:32574062~32574318	256	0.735726	0.0631328	0
chr1:32645155~32645814	659	0.384054	0.052744	0
chr1:32666232~32666460	228	0.7688	0.0819587	0
chr1:32687522~32688040	518	0.367663	0.0975869	0
chr1:32713919~32714186	267	2.88119	0.136151	0
chr1:32740711~32741544	833	18.3726	0.780857	1
chr1:32757415~32758034	619	0.35697	0.076193	0
chr1:32817199~32817588	389	0.357368	0.0682167	0
chr1:32859771~32860348	577	0.154513	0.125546	0
chr1:32892429~32892835	406	2.51147	0.455889	0
chr1:32930501~32931061	560	0.644137	0.113123	0
chr1:32966119~32966563	444	0.227888	0.103735	0
chr1:33005424~33005739	315	0.468673	0.0861716	0
chr1:33116544~33117363	819	0.170081	0.0683474	0
chr1:33168020~33168865	845	0.416611	0.176437	0
chr1:33207637~33207874	237	0.157994	0.118247	0
chr1:33219428~33220028	600	2.55456	0.0731085	0
chr1:33235495~33235718	223	101.605	0.91439	1
chr1:33351687~33352397	710	0.962813	0.111611	0
chr1:33358470~33359449	979	0.855383	0.141899	0
chr1:33366793~33367002	209	0	0.168233	0
chr1:33429532~33430513	981	0.188355	0.0364651	0
chr1:33438459~33438979	520	0.539198	0.157598	0
chr1:33502202~33502719	517	0.136705	0.0670409	0
chr1:33516595~33516933	338	93.9752	0.546048	1
chr1:33546525~33547243	718	0.579688	0.0602316	0
chr1:33592892~33593155	263	0	0.0504016	0
chr1:33612977~33613321	344	58.2162	0.939163	1
chr1:33625260~33625527	267	68.8603	0.928682	1
chr1:33721449~33721703	254	0.391761	0.0629085	0
chr1:33741775~33742381	606	72.0936	0.928924	1
chr1:33745742~33745990	248	60.7593	0.956229	1
chr1:33772147~33773104	957	9.96765	0.527099	1
chr1:33814784~33815770	986	0.215689	0.034586	0
chr1:33815951~33816193	242	0.819438	0.0322466	0
chr1:33896003~33896929	926	0.505274	0.0805079	0
chr1:33938026~33938328	302	0.481233	0.066176	0
chr1:34090606~34090854	248	49.5656	0.829018	1
chr1:34098897~34099119	222	4.83392	0.371874	0
chr1:34642383~34643024	641	1.08419	0.280607	0
chr1:35227029~35227276	247	106.488	0.848047	1
chr1:35246877~35247599	722	0.684273	0.13655	0
chr1:35250419~35250736	317	48.0336	0.938831	1
chr1:35258565~35258791	226	1.12855	0.184231	0
chr1:35325183~35325550	367	0.802748	0.0491093	0
chr1:35331704~35332409	705	0.737624	0.0831299	0
chr1:35334305~35334506	201	105.905	0.977234	1
chr1:35350879~35351854	975	0.504088	0.223688	0
chr1:35442238~35442936	698	68.5954	0.947185	1
chr1:35450650~35451037	387	0.369326	0.0727696	0
chr1:35497122~35497587	465	0.527114	0.0913237	0
chr1:35544928~35545303	375	0.37162	0.0479398	0
chr1:35586332~35586591	259	3.92044	0.222748	0
chr1:35734224~35734855	631	0.512505	0.0942259	0
chr1:36106970~36107261	291	0.843417	0.0681006	0
chr1:36173407~36173979	572	0.911742	0.102118	0
chr1:36184249~36184774	525	0.13071	0.0967995	0
chr1:36234925~36235800	875	0.376456	0.0832471	0
chr1:36273500~36274461	961	0.2131	0.0838478	0
chr1:36549555~36549965	410	0.422802	0.103626	0
chr1:36554326~36554955	629	0.292182	0.081482	0
chr1:36590762~36591121	359	0.943311	0.166593	0
chr1:36614856~36615462	606	0.180761	0.0624901	0
chr1:36621452~36622310	858	0.500909	0.0690147	0
chr1:36641757~36642461	704	85.1382	0.951705	1
chr1:36643956~36644327	371	83.875	0.910047	1
chr1:36689760~36690087	327	0.114642	0.0468334	0
chr1:36807363~36807584	221	85.5292	0.910781	1
chr1:36851090~36851873	783	0.26128	0.128168	0
chr1:36863212~36863603	391	0.289679	0.0620858	0
chr1:36915797~36916324	527	1.21046	0.123307	0
chr1:36929415~36930131	716	0.224736	0.0500704	0
chr1:37783612~37784258	646	2.10403	0.239727	0
chr1:37939724~37940650	926	0.213417	0.0539879	0
chr1:37980072~37980565	493	0.0787635	0.0374589	0
chr1:38019607~38019823	216	1.53721	0.0473704	0
chr1:38022453~38022719	266	25.1175	0.555087	1
chr1:38061429~38061740	311	0.549264	0.0492385	0
chr1:38156043~38156279	236	0.134615	0.0642221	0
chr1:38200920~38201200	280	2.62468	0.361878	0
chr1:38218191~38218977	786	0.843545	0.2037	0
chr1:38219703~38220012	309	1.18345	0.102899	0
chr1:38227080~38227741	661	45.8036	0.625196	1
chr1:38325151~38325999	848	0.389431	0.0671434	0
chr1:38397237~38397721	484	0.683911	0.0510655	0
chr1:38455233~38455769	536	0.449789	0.062439	0
chr1:38461585~38461988	403	49.4932	0.600323	1
chr1:38470618~38471396	778	0.18102	0.09617	0
chr1:38478083~38478727	644	0.394876	0.0841559	0
chr1:38941920~38942404	484	1.07644	0.307383	0
chr1:39044060~39044561	501	0.656998	0.10179	0
chr1:39174380~39174940	560	45.2068	0.737439	1
chr1:39269730~39270251	521	0.523259	0.0935986	0
chr1:39283610~39284576	966	0.971747	0.201026	0
chr1:39324816~39325721	905	0.284478	0.067749	0
chr1:39338480~39339349	869	0.463525	0.135682	0
chr1:39456656~39457271	615	0	0.0595242	0
chr1:39547014~39547959	945	3.69706	0.294832	0
chr1:40105011~40105707	696	1.00577	0.167424	0
chr1:40149432~40150013	581	4.71112	0.339211	0
chr1:40204313~40204739	426	0.253449	0.0590763	0
chr1:40348942~40349288	346	0.421196	0.0751088	0
chr1:40420488~40421366	878	0.308143	0.0979196	0
chr1:40562667~40563128	461	0.319408	0.0761581	0
chr1:40598509~40599209	700	29.0447	0.600889	1
chr1:40626914~40627612	698	0.443939	0.0604853	0
chr1:40723387~40723698	311	0.591442	0.0655127	0
chr1:40723797~40724010	213	0	0.0664604	0
chr1:40769187~40769871	684	79.8362	0.912776	1
chr1:40781005~40781445	440	0.650785	0.0487566	0
chr1:40781680~40781956	276	0.746531	0.157481	0
chr1:40782221~40783145	924	0.765831	0.147551	0
chr1:40839216~40840022	806	0.263258	0.0655304	0
chr1:40915606~40916072	466	0.30617	0.0700881	0
chr1:40942785~40943387	602	0.693349	0.0710059	0
chr1:40974057~40974786	729	0.235241	0.0689436	0
chr1:40997161~40997439	278	0.434453	0.0582845	0
chr1:41119853~41120136	283	4.48943	0.656445	1
chr1:41131112~41131378	266	0.280901	0.0569592	0
chr1:41157163~41157975	812	0.273842	0.0548025	0
chr1:41267920~41268398	478	0.57885	0.0558569	0
chr1:41283841~41284591	750	1.92171	0.162422	0
chr1:41284848~41285149	301	13.9354	0.675329	1
chr1:41349741~41350293	552	3.93446	0.322959	0
chr1:41483419~41483693	274	49.7236	0.892636	1
chr1:41831977~41832542	565	0.863268	0.0830213	0
chr1:41889271~41889626	355	27.9414	0.619286	1
chr1:41961851~41962316	465	0.398122	0.0608808	0
chr1:41981789~41982043	254	1.06415	0.293828	0
chr1:42383641~42384003	362	0.604288	0.168759	0
chr1:42611486~42611691	205	40.4337	0.651911	1
chr1:42921717~42922575	858	0.257942	0.0624773	0
chr1:42928798~42929500	702	0.603638	0.204373	0
chr1:43123978~43124422	444	0.306583	0.101867	0
chr1:43204116~43204323	207	28.85	0.811229	1
chr1:43250763~43251082	319	4.27835	0.252986	0
chr1:43282575~43283090	515	0.212266	0.0433726	0
chr1:43312259~43312513	254	0.6333	0.0939267	0
chr1:43352786~43352994	208	61.9664	0.904064	1
chr1:43353242~43353442	200	85.6303	0.910211	1
chr1:43353948~43354170	222	68.9497	0.817984	1
chr1:43389836~43390551	715	0.588653	0.0594328	0
chr1:43472868~43473334	466	36.6229	0.572048	1
chr1:43533891~43534334	443	0.96783	0.152988	0
chr1:43613489~43613842	353	0.613798	0.146679	0
chr1:43637504~43638052	548	0.32796	0.0542154	0
chr1:43738485~43738829	344	56.0956	0.877043	1
chr1:43770523~43770880	357	87.6288	0.930656	1
chr1:43814306~43815277	971	51.3759	0.7513	1
chr1:43824135~43825059	924	0.463875	0.0577764	0
chr1:43832815~43833073	258	0.964425	0.0477853	0
chr1:43833829~43834137	308	0.228544	0.0791389	0
chr1:43855376~43855921	545	0.267433	0.0598829	0
chr1:43919084~43919814	730	0.158625	0.0961346	0
chr1:43996725~43997592	867	0.315908	0.115514	0
chr1:44031287~44031853	566	18.2376	0.198702	0
chr1:44056756~44057179	423	110.832	0.900762	1
chr1:44063470~44063757	287	134.046	0.933432	1
chr1:44070893~44071142	249	37.8026	0.910545	1
chr1:44115617~44116309	692	0.280442	0.0916199	0
chr1:44399069~44399535	466	0.297234	0.227753	0
chr1:44401758~44402423	665	0.39648	0.251325	0
chr1:44412074~44412804	730	0.204143	0.0587672	0
chr1:44435410~44436114	704	0.362591	0.0711664	0
chr1:44444636~44445622	986	0.320678	0.118873	0
chr1:44457151~44457772	621	0.401014	0.0666238	0
chr1:44568992~44569399	407	53.4641	0.804447	1
chr1:44679004~44679465	461	0.301186	0.0497981	0
chr1:44820658~44821113	455	0.493297	0.0540046	0
chr1:45082740~45083285	545	70.6763	0.95192	1
chr1:45097282~45098049	767	0.131064	0.188875	0
chr1:45120238~45120723	485	44.1894	0.906438	1
chr1:45139771~45140584	813	0.307069	0.0860203	0
chr1:45189706~45190558	852	40.3888	0.655166	1
chr1:45205324~45205745	421	0.335424	0.0440923	0
chr1:45241014~45241900	886	0.10916	0.085854	0
chr1:45249861~45250352	491	1.11425	0.0612223	0
chr1:45251963~45252292	329	4.32834	0.173266	0
chr1:45271680~45272318	638	69.7854	0.909605	1
chr1:45278766~45279644	878	15.2137	0.56206	1
chr1:45308544~45309159	615	0.61014	0.108824	0
chr1:45452038~45452444	406	0.636147	0.0497712	0
chr1:45476226~45477022	796	0.229146	0.0664542	0
chr1:45671703~45672388	685	0.543581	0.0554059	0
chr1:45769214~45769917	703	0.36831	0.0649124	0
chr1:45792420~45793301	881	6.64228	0.130743	0
chr1:45805565~45805983	418	0.253298	0.0384915	0
chr1:45956346~45956893	547	0.337024	0.0644489	0
chr1:45965587~45966049	462	0.318419	0.0437547	0
chr1:45987164~45987803	639	0.30218	0.114678	0
chr1:46016404~46016694	290	0.264763	0.0645983	0
chr1:46049591~46050582	991	0.212899	0.0763786	0
chr1:46088195~46089142	947	84.3392	0.889312	1
chr1:46216234~46216514	280	0.113537	0.0448623	0
chr1:46269100~46269820	720	38.3023	0.195912	0
chr1:46632690~46632932	242	0.59772	0.0551353	0
chr1:46668822~46669258	436	0.535272	0.107833	0
chr1:46705909~46706165	256	127.4	0.908048	1
chr1:46806340~46806836	496	0.281945	0.049118	0
chr1:46859725~46860291	566	1.5424	0.328836	0
chr1:46913787~46914343	556	0.954574	0.154886	0
chr1:46932131~46932892	761	1.22562	0.217819	0
chr1:46940237~46940437	200	4.85453	0.313165	0
chr1:46951169~46951792	623	1.44444	0.113359	0
chr1:46998633~46999249	616	0.332955	0.0855571	0
chr1:47009576~47010132	556	1.25676	0.283868	0
chr1:47069616~47070179	563	0.533756	0.0718264	0
chr1:47078581~47078967	386	73.8251	0.961714	1
chr1:47082017~47082526	509	0.426876	0.0743934	0
chr1:47133675~47134395	720	0.380197	0.0910369	0
chr1:47184403~47185083	680	0.324645	0.0478149	0
chr1:47489227~47489633	406	2.90362	0.197581	0
chr1:47690981~47691727	746	0.380978	0.113768	0
chr1:47779708~47780211	503	0.352388	0.0566065	0
chr1:47899126~47899398	272	5.67751	0.467934	0
chr1:47899662~47900385	723	6.09832	0.435506	0
chr1:47915640~47915952	312	0.929404	0.151533	0
chr1:47973710~47973952	242	0.456547	0.0580759	0
chr1:47998900~47999517	617	1.89737	0.215972	0
chr1:48058794~48059230	436	0.946816	0.110194	0
chr1:48190757~48190992	235	0.777187	0.106694	0
chr1:48449871~48450144	273	30.5352	0.162354	0
chr1:48459813~48460061	248	46.9312	0.789979	1
chr1:48462132~48462976	844	0.858174	0.0952371	0
chr1:48937305~48937683	378	0.730939	0.0974844	0
chr1:49242372~49242810	438	0.478187	0.0471109	0
chr1:49364555~49364870	315	75.8004	0.683165	1
chr1:50489418~50489846	428	0.852771	0.149038	0
chr1:50513645~50514320	675	1.33812	0.192676	0
chr1:50798668~50799536	868	1.09028	0.107227	0
chr1:50880917~50881516	599	1.01549	0.195171	0
chr1:50881885~50882103	218	0.967249	0.111484	0
chr1:50882434~50882660	226	0.633192	0.119824	0
chr1:50882998~50883426	428	1.37131	0.196717	0
chr1:50892438~50893243	805	0.456939	0.163154	0
chr1:50893469~50893745	276	1.00133	0.160709	0
chr1:51425448~51426070	622	0	0.0696753	0
chr1:51443312~51444036	724	0.506031	0.0753549	0
chr1:51701768~51702542	774	0.112828	0.0797999	0
chr1:51796098~51796589	491	0.469092	0.125303	0
chr1:51810328~51810687	359	1.30493	0.219116	0
chr1:51984548~51985216	668	0.344225	0.100072	0
chr1:52195029~52195821	792	0.502925	0.0594608	0
chr1:52344179~52344939	760	0.179827	0.0936326	0
chr1:52455971~52456453	482	0.72326	0.0708914	0
chr1:52520747~52521124	377	0.0954798	0.0436388	0
chr1:52521781~52522296	515	0.503709	0.0688619	0
chr1:52831512~52832181	669	0.244338	0.0576956	0
chr1:52834140~52834528	388	0.354848	0.0919034	0
chr1:52869868~52870305	437	0.69723	0.0566663	0
chr1:53067881~53068608	727	0.682951	0.0939028	0
chr1:53098630~53099303	673	0.587052	0.163016	0
chr1:53163689~53164180	491	0.507228	0.0703219	0
chr1:53192024~53192428	404	0.587259	0.0692384	0
chr1:53308295~53309262	967	1.12305	0.203543	0
chr1:53386618~53387523	905	8.4792	0.303989	0
chr1:53392881~53393645	764	0.521271	0.0961745	0
chr1:53544105~53544683	578	51.0281	0.896556	1
chr1:53558389~53558642	253	25.5901	0.811708	1
chr1:53662310~53662815	505	0.357671	0.0972247	0
chr1:53685946~53686391	445	0.271777	0.106956	0
chr1:53703960~53704642	682	1.07262	0.142219	0
chr1:53742298~53742845	547	96.0684	0.946153	1
chr1:54303759~54304262	503	0.494717	0.0428846	0
chr1:54355355~54355656	301	0.489808	0.0871274	0
chr1:54411058~54411943	885	0.171841	0.0768893	0
chr1:54518602~54519299	697	0.398802	0.0591233	0
chr1:54587365~54587578	213	0	0.0898827	0
chr1:54665822~54666259	437	0.595614	0.0915015	0
chr1:54723697~54724019	322	32.6666	0.952773	1
chr1:54821991~54822333	342	0.989649	0.369724	0
chr1:54856402~54856608	206	81.1164	0.946808	1
chr1:54872674~54873000	326	0.218567	0.0588766	0
chr1:54940347~54940753	406	1.1816	0.194745	0
chr1:54965024~54965391	367	0.726814	0.0960534	0
chr1:55007705~55008448	743	1.21671	0.0607857	0
chr1:55181346~55181853	507	0.62442	0.0669072	0
chr1:55229993~55230369	376	0.236893	0.0681931	0
chr1:55246743~55247519	776	85.8421	0.859546	1
chr1:55266278~55267058	780	10.3201	0.205782	0
chr1:55271666~55271972	306	115.841	0.912212	1
chr1:55352464~55353328	864	0.761786	0.104901	0
chr1:55446088~55446846	758	2.18342	0.203595	0
chr1:55462689~55463010	321	2.8152	0.138801	0
chr1:55505061~55506015	954	0.462855	0.184555	0
chr1:56943402~56943669	267	1.41765	0.222794	0
chr1:57110664~57111337	673	0.390591	0.0774694	0
chr1:58715273~58716095	822	0.799412	0.089143	0
chr1:59012327~59012577	250	0	0.0631412	0
chr1:59280241~59280490	249	45.8804	0.895571	1
chr1:59280952~59281194	242	2.23145	0.181096	0
chr1:59281890~59282235	345	0.10431	0.0399677	0
chr1:59369312~59369900	588	0.29413	0.0821725	0
chr1:59612408~59612723	315	0.456175	0.0727104	0
chr1:59762103~59762794	691	0.10394	0.0915408	0
chr1:60280625~60281048	423	0.172968	0.155867	0
chr1:60392273~60392583	310	0.41151	0.106427	0
chr1:60539316~60539540	224	2.81408	0.320791	0
chr1:61508643~61509282	639	2.3114	0.129238	0
chr1:61515876~61516831	955	0.225171	0.108042	0
chr1:61519353~61519971	618	1.17183	0.112272	0
chr1:61542538~61542877	339	0.831544	0.0634025	0
chr1:61548754~61549564	810	0.568462	0.139295	0
chr1:62119875~62120093	218	100.037	0.819832	1
chr1:62190648~62190942	294	0.566532	0.0895898	0
chr1:62207828~62208818	990	0.463943	0.0678304	0
chr1:62660556~62660946	390	2.05766	0.231031	0
chr1:62784137~62785133	996	1.13742	0.120722	0
chr1:63153381~63154349	968	0.322431	0.111192	0
chr1:63795364~63796140	776	0.729462	0.154206	0
chr1:63833110~63833821	711	0.409541	0.0991313	0
chr1:64058938~64059913	975	0.22769	0.0955704	0
chr1:65210283~65211238	955	0.193748	0.0951851	0
chr1:65468273~65468828	555	0.956445	0.0627519	0
chr1:65533593~65533965	372	0.547004	0.0921602	0
chr1:65720048~65720592	544	0.136198	0.0547266	0
chr1:65731412~65731849	437	0.589359	0.146201	0
chr1:65775019~65775746	727	0.883255	0.0954118	0
chr1:65885857~65886704	847	0.163689	0.0798706	0
chr1:65991002~65991811	809	0.923578	0.158485	0
chr1:66258441~66258918	477	1.10111	0.0981516	0
chr1:66998729~66999060	331	1.29412	0.142249	0
chr1:67218080~67218293	213	0.335641	0.0905283	0
chr1:67390469~67391109	640	0.05575	0.132417	0
chr1:67395684~67396483	799	0.479753	0.0535846	0
chr1:67519225~67520139	914	0.534006	0.0883348	0
chr1:67600391~67600715	324	3.45828	0.162584	0
chr1:67773330~67773767	437	0.556464	0.0626707	0
chr1:68298372~68299315	943	0.821114	0.0738907	0
chr1:68512644~68513005	361	61.1179	0.617127	1
chr1:68516237~68516473	236	38.3986	0.530047	1
chr1:68517255~68517474	219	45.5034	0.555062	1
chr1:68629000~68629202	202	101.998	0.786387	1
chr1:68696640~68697628	988	0.337043	0.124785	0
chr1:68962284~68963006	722	0.339015	0.0557897	0
chr1:70385044~70385270	226	46.7846	0.838829	1
chr1:70671184~70671442	258	0.139349	0.0603814	0
chr1:70687301~70687560	259	0.520445	0.0984804	0
chr1:70819734~70820719	985	0.393216	0.0785372	0
chr1:70876623~70877091	468	1.01513	0.0667577	0
chr1:71546487~71546783	296	0.464182	0.0857203	0
chr1:74663827~74664035	208	0.179917	0.0391246	0
chr1:75590818~75591354	536	8.14681	0.388365	0
chr1:75595814~75596162	348	1.29097	0.202345	0
chr1:75596724~75596947	223	0.62953	0.128636	0
chr1:75600675~75601415	740	1.03929	0.0681765	0
chr1:75601999~75602878	879	0.606294	0.179849	0
chr1:76080455~76080808	353	1.0075	0.0817511	0
chr1:76081379~76082365	986	0.552028	0.0880786	0
chr1:76189917~76190730	813	0.323414	0.034111	0
chr1:76262537~76262903	366	42.5442	0.891368	1
chr1:76540148~76540653	505	0.281242	0.0564513	0
chr1:77684997~77685252	255	0.88775	0.064856	0
chr1:77747315~77748224	909	0.375838	0.122413	0
chr1:78224844~78225650	806	0.214668	0.0861311	0
chr1:78277367~78277607	240	59.2295	0.917366	1
chr1:78354382~78354673	291	0.639833	0.132672	0
chr1:78444304~78444605	301	0.481399	0.0906705	0
chr1:78444764~78445281	517	0.300758	0.0682584	0
chr1:78511578~78512161	583	0.395028	0.069332	0
chr1:78956625~78957516	891	0.400503	0.140951	0
chr1:79472282~79472537	255	5.29772	0.358483	0
chr1:84326268~84326838	570	1.1294	0.120319	0
chr1:84764109~84764906	797	0.435419	0.0750211	0
chr1:84944933~84945350	417	0.713919	0.107959	0
chr1:85039826~85040344	518	0.270183	0.0986911	0
chr1:85086322~85086766	444	0.268192	0.181122	0
chr1:85155606~85156574	968	0.107505	0.0569661	0
chr1:85220019~85220338	319	43.6587	0.896147	1
chr1:85358360~85359187	827	0.613557	0.117019	0
chr1:85462586~85463435	849	0.987006	0.127154	0
chr1:85463885~85464167	282	1.1642	0.12375	0
chr1:85724702~85725524	822	0.258723	0.0960016	0
chr1:85741866~85742535	669	0.442901	0.0701558	0
chr1:86042230~86042935	705	0.594687	0.126729	0
chr1:86046363~86047240	877	0.396964	0.102965	0
chr1:86081701~86082068	367	26.1752	0.671452	1
chr1:86174042~86174253	211	0.626965	0.0344425	0
chr1:86861567~86862083	516	0.584166	0.0627945	0
chr1:87018669~87019254	585	58.37	0.769991	1
chr1:87597544~87598515	971	1.40026	0.229363	0
chr1:87617154~87617417	263	0.818916	0.107763	0
chr1:87617693~87617986	293	1.35832	0.200431	0
chr1:87797369~87797884	515	0.687809	0.0732808	0
chr1:87800836~87801252	416	0.203174	0.0508307	0
chr1:88928284~88928760	476	1.64267	0.306649	0
chr1:89356964~89357391	427	0.437974	0.08868	0
chr1:89458035~89458604	569	0.0559716	0.0576325	0
chr1:90228745~90229173	428	0.675909	0.102525	0
chr1:90308840~90309606	766	0.515522	0.0754469	0
chr1:90460400~90461237	837	0.496322	0.0547065	0
chr1:91172103~91172771	668	0.684023	0.121146	0
chr1:91176405~91176701	296	0.618712	0.121933	0
chr1:91182098~91182364	266	0.667352	0.247183	0
chr1:91182510~91182857	347	0.434358	0.225966	0
chr1:91185157~91185577	420	1.60929	0.272991	0
chr1:91189140~91189400	260	0.559599	0.183741	0
chr1:91300980~91301891	911	19.4847	0.224385	0
chr1:91359123~91359563	440	84.8749	0.707592	1
chr1:91487159~91487807	648	0.337034	0.0884494	0
chr1:91869877~91870390	513	0.455777	0.0902129	0
chr1:91966264~91966999	735	0.15251	0.0497612	0
chr1:92001024~92001444	420	77.1857	0.969483	1
chr1:92011830~92012062	232	87.9633	0.912383	1
chr1:92012337~92012656	319	34.801	0.862908	1
chr1:92414719~92414986	267	62.482	0.722976	1
chr1:92495368~92495964	596	0.425677	0.102903	0
chr1:92545820~92546480	660	0.325749	0.0833846	0
chr1:92683439~92683682	243	43.277	0.893834	1
chr1:92764174~92764926	752	0.576308	0.0508289	0
chr1:93297499~93298122	623	0.344183	0.0714722	0
chr1:93544559~93545032	473	0.539167	0.0431749	0
chr1:93811219~93811940	721	0.15563	0.0767841	0
chr1:93913637~93914524	887	0.436546	0.0955575	0
chr1:94313318~94313628	310	0.706706	0.0661506	0
chr1:94344508~94344822	314	0	0.0533279	0
chr1:94702691~94703344	653	0.552987	0.104471	0
chr1:94712907~94713517	610	0.301958	0.0552979	0
chr1:94883526~94884402	876	0.252091	0.065655	0
chr1:95285603~95286319	716	0.358239	0.168517	0
chr1:95538252~95538551	299	0.106346	0.0522706	0
chr1:95582751~95583572	821	0.588278	0.0986226	0
chr1:95699726~95700142	416	0.347358	0.0734687	0
chr1:97187103~97187606	503	0.513109	0.0541207	0
chr1:98386190~98386724	534	0.340169	0.0588416	0
chr1:98510967~98511710	743	0.400184	0.0753345	0
chr1:98519002~98519983	981	0.556376	0.089603	0
chr1:99126873~99127711	838	0.595798	0.0818107	0
chr1:99729983~99730335	352	0.908252	0.142493	0
chr1:100315421~100316009	588	0.526467	0.0679	0
chr1:100435298~100436070	772	0.496657	0.0893926	0
chr1:100503483~100504404	921	0.341223	0.0775112	0
chr1:100598131~100598754	623	0.408134	0.0659352	0
chr1:100678767~100679098	331	111.432	0.72921	1
chr1:100731633~100731999	366	0.195714	0.071798	0
chr1:101360589~101360832	243	1.30844	0.0790333	0
chr1:101361550~101361808	258	0	0.0633539	0
chr1:101491318~101491680	362	0.654989	0.057643	0
chr1:101701786~101702068	282	0.493167	0.0647393	0
chr1:101702446~101702745	299	0.239424	0.0543694	0
chr1:104068488~104068913	425	0.546799	0.112541	0
chr1:106623394~106623854	460	16.2405	0.405468	0
chr1:108023233~108023442	209	20.915	0.221863	0
chr1:108507252~108507841	589	0.110036	0.102198	0
chr1:108735228~108735513	285	56.0963	0.93037	1
chr1:108742401~108743201	800	0.727957	0.0793836	0
chr1:109102539~109103212	673	0.285819	0.0827514	0
chr1:109203594~109204378	784	1.6363	0.146184	0
chr1:109234789~109235161	372	0.603877	0.0575603	0
chr1:109289019~109289822	803	0.313316	0.0581739	0
chr1:109419545~109420038	493	0.497336	0.068704	0
chr1:109505682~109506214	532	0.198455	0.0555098	0
chr1:109618580~109618832	252	0.421141	0.0561962	0
chr1:109633189~109633632	443	0.246463	0.0702559	0
chr1:109642664~109643384	720	0.627972	0.0935324	0
chr1:109656096~109656611	515	1.16023	0.0725001	0
chr1:109756443~109757098	655	0.525965	0.0659021	0
chr1:109791946~109792723	777	0.128405	0.127934	0
chr1:109801055~109801700	645	108.882	0.939241	1
chr1:109824314~109824526	212	21.0463	0.880845	1
chr1:109825711~109826207	496	0.527662	0.0564079	0
chr1:109940075~109940894	819	0.471419	0.0922752	0
chr1:109968649~109969570	921	0.235458	0.069866	0
chr1:110026631~110026903	272	0.237807	0.0559439	0
chr1:110036546~110036943	397	0.094479	0.0901368	0
chr1:110051955~110052505	550	0.469726	0.0511526	0
chr1:110091040~110091590	550	0.272234	0.0363283	0
chr1:110162465~110162716	251	0.402422	0.0674165	0
chr1:110185962~110186164	202	0.842437	0.146946	0
chr1:110198542~110199127	585	0.62562	0.087147	0
chr1:110210582~110210956	374	0.989347	0.141776	0
chr1:110230239~110230614	375	0	0.344552	0
chr1:110282352~110283306	954	0.567804	0.161538	0
chr1:110453144~110453889	745	0.385155	0.132905	0
chr1:110527249~110528026	777	0.424988	0.0545425	0
chr1:110577200~110577942	742	0.409244	0.0847254	0
chr1:110626529~110627484	955	0.825901	0.0870886	0
chr1:110672811~110673339	528	1.45447	0.231275	0
chr1:110765666~110766012	346	54.1201	0.904256	1
chr1:110880395~110880624	229	0.464739	0.0748248	0
chr1:110949893~110950540	647	0.232075	0.0556097	0
chr1:111098067~111098362	295	0.949719	0.0935283	0
chr1:111323224~111323433	209	3.61883	0.519033	1
chr1:111746338~111747303	965	0.253793	0.0916835	0
chr1:111813412~111813853	441	1.68627	0.218634	0
chr1:111889139~111889539	400	1.13545	0.167286	0
chr1:111991305~111992202	897	0.36415	0.0553638	0
chr1:112058185~112058590	405	9.70854	0.310003	0
chr1:112162205~112162837	632	0.338788	0.0360748	0
chr1:112298042~112298992	950	0.530671	0.0677267	0
chr1:112524469~112525385	916	121.708	0.902972	1
chr1:112938496~112939113	617	0.197001	0.0993706	0
chr1:113008845~113009154	309	0.353575	0.0608251	0
chr1:113044411~113044992	581	0.681848	0.145882	0
chr1:113161592~113162571	979	0.46806	0.072482	0
chr1:113217476~113218097	621	0.449876	0.0421679	0
chr1:113249343~113250198	855	0.143528	0.0558878	0
chr1:113261469~113261765	296	4.08055	0.459915	0
chr1:113265574~113265787	213	7.73345	0.291595	0
chr1:113286333~113287172	839	1.11723	0.215306	0
chr1:113392143~113392807	664	0.789788	0.154948	0
chr1:113497987~113498206	219	1.28524	0.123414	0
chr1:113498367~113499312	945	0.406986	0.0721245	0
chr1:113615592~113616260	668	0.426594	0.0695186	0
chr1:113741474~113741745	271	67.5211	0.80557	1
chr1:114301515~114302272	757	0.192347	0.102206	0
chr1:114354374~114355300	926	0.225295	0.053176	0
chr1:114447455~114448024	569	0	0.0326199	0
chr1:114471966~114472899	933	0.292533	0.0797382	0
chr1:114696887~114697185	298	0.993269	0.160607	0
chr1:115212240~115212985	745	0.576192	0.0650825	0
chr1:115323076~115323462	386	0.767604	0.0567199	0
chr1:115397449~115397942	493	14.3118	0.373728	0
chr1:115631851~115632584	733	0.290323	0.0865641	0
chr1:116370811~116371303	492	1.52657	0.176915	0
chr1:116518758~116519537	779	0.197731	0.0805677	0
chr1:116694665~116694983	318	0.231575	0.0754703	0
chr1:116710158~116710546	388	9.3112	0.681739	1
chr1:116710838~116711260	422	0.344444	0.127523	0
chr1:116961183~116961542	359	0.412587	0.0660756	0
chr1:117077043~117077299	256	95.2906	0.911041	1
chr1:117112961~117113883	922	0.160714	0.105822	0
chr1:117209825~117210621	796	0.407172	0.117726	0
chr1:117284384~117284627	243	96.8767	0.950856	1
chr1:117487250~117487645	395	115.758	0.924408	1
chr1:117602389~117603270	881	0.632074	0.0620067	0
chr1:117664181~117665148	967	1.05189	0.096369	0
chr1:118471841~118472720	879	0.525918	0.0566847	0
chr1:118727817~118728097	280	0.904679	0.165143	0
chr1:119522386~119522638	252	1.1735	0.171333	0
chr1:119526783~119527192	409	2.40584	0.268038	0
chr1:119529820~119530712	892	0.930101	0.158212	0
chr1:119531992~119532196	204	0.768206	0.170057	0
chr1:119535667~119535987	320	0.788537	0.212951	0
chr1:119543057~119543454	397	1.28711	0.18419	0
chr1:119543822~119544339	517	0.562492	0.225772	0
chr1:119682875~119683411	536	0.692617	0.0519013	0
chr1:119870227~119870535	308	1.09829	0.151116	0
chr1:120190378~120191251	873	0.543066	0.0867372	0
chr1:120254845~120255499	654	0.868199	0.0555693	0
chr1:120395810~120396075	265	49.1672	0.803079	1
chr1:120439014~120439220	206	49.8108	0.737888	1
chr1:120905972~120906396	424	56.1797	0.674572	1
chr1:120925179~120926081	902	0.503358	0.102759	0
chr1:121260858~121261525	667	0.737671	0.10694	0
chr1:142618752~142619238	486	158.261	0.655548	1
chr1:142890555~142891041	486	73.9574	0.458217	0
chr1:143270159~143270509	350	67.7264	0.5707	1
chr1:143467294~143467675	381	68.608	0.637867	1
chr1:143663819~143664138	319	19.5461	0.591057	1
chr1:144533704~144534030	326	12.0326	0.49729	0
chr1:144593335~144594233	898	0.678221	0.0637637	0
chr1:145039741~145040180	439	1.44532	0.0626382	0
chr1:145075484~145075845	361	2.83049	0.187007	0
chr1:145096394~145096784	390	0.57309	0.090546	0
chr1:145139473~145139944	471	0.464987	0.145982	0
chr1:145382417~145382740	323	9.22678	0.194677	0
chr1:145385290~145385537	247	48.1349	0.733605	1
chr1:145415412~145415708	296	1.63385	0.124382	0
chr1:145470242~145470673	431	0.559657	0.0620727	0
chr1:145477023~145477479	456	0.40026	0.0379561	0
chr1:145507589~145507931	342	5.46922	0.201183	0
chr1:145516039~145516637	598	0.234858	0.0566681	0
chr1:145589136~145589535	399	0.444293	0.0774238	0
chr1:145610680~145611143	463	0.239863	0.0700796	0
chr1:145611271~145611519	248	6.08024	0.119177	0
chr1:145713967~145714203	236	1.82945	0.434428	0
chr1:145826492~145827224	732	0.242602	0.0842618	0
chr1:146522289~146522555	266	75.0067	0.846421	1
chr1:146543988~146544439	451	6.1325	0.531956	1
chr1:146549851~146550075	224	1.48405	0.565337	1
chr1:146550291~146551260	969	1.7178	0.461822	0
chr1:146551477~146551764	287	2.00175	0.169898	0
chr1:146552329~146552577	248	9.96079	0.249028	0
chr1:146556313~146556676	363	0.656995	0.103328	0
chr1:146649623~146649852	229	39.3634	0.535541	1
chr1:147071250~147071875	625	0.808188	0.0537912	0
chr1:147380139~147380482	343	88.8443	0.932022	1
chr1:147400355~147401087	732	0.645081	0.0565712	0
chr1:147718157~147718915	758	8.5484	0.41851	0
chr1:147735450~147735751	301	1.53386	0.0772135	0
chr1:147737016~147737303	287	19.5308	0.601117	1
chr1:147752860~147753165	305	0.351838	0.151606	0
chr1:147775222~147775584	362	0.386555	0.128247	0
chr1:147782067~147782473	406	8.57132	0.643228	1
chr1:147789653~147790094	441	21.276	0.527839	1
chr1:147806901~147807170	269	0.875609	0.193021	0
chr1:147826168~147826388	220	10.4968	0.517245	1
chr1:147993811~147994130	319	0.341968	0.253	0
chr1:147997266~147997537	271	71.4026	0.879682	1
chr1:147999932~148000778	846	1.44043	0.250446	0
chr1:148176289~148176727	438	0.675954	0.111481	0
chr1:148241110~148241449	339	2.70823	0.201932	0
chr1:148244590~148244861	271	118.702	0.844375	1
chr1:148247246~148248092	846	1.85754	0.171524	0
chr1:148555641~148556626	985	0.995107	0.0607678	0
chr1:148760452~148761299	847	1.27175	0.238021	0
chr1:148767244~148767448	204	3.25202	0.0221443	0
chr1:148864532~148865184	652	25.7327	0.414034	0
chr1:148903434~148903658	224	66.3363	0.950183	1
chr1:149137543~149138399	856	0.630814	0.203633	0
chr1:149146209~149146697	488	1.52042	0.29963	0
chr1:149148146~149148374	228	4.15954	0.453206	0
chr1:149149251~149149505	254	4.08101	0.376404	0
chr1:149156107~149156671	564	0.805046	0.243498	0
chr1:149162390~149162615	225	2.99719	0.486367	0
chr1:149224359~149224642	283	1.76983	0.180268	0
chr1:149230772~149231197	425	0.672887	0.386948	0
chr1:149261002~149261249	247	134.051	0.941527	1
chr1:149286813~149287773	960	27.7336	0.444414	0
chr1:149332994~149333389	395	15.4941	0.378229	0
chr1:149333786~149334111	325	2.58631	0.225326	0
chr1:149379199~149380059	860	0.321016	0.11222	0
chr1:149398826~149399250	424	47.1152	0.496096	0
chr1:149399899~149400518	619	0.982136	0.25422	0
chr1:149514272~149514592	320	0.484227	0.255129	0
chr1:149605515~149605903	388	0.597048	0.332856	0
chr1:149646604~149646851	247	116.807	0.872446	1
chr1:149718543~149718918	375	6.47364	0.409553	0
chr1:149719315~149719640	325	2.76803	0.0925087	0
chr1:149764129~149764989	860	0.407875	0.0818249	0
chr1:149783525~149784024	499	16.0634	0.420245	0
chr1:149784593~149785212	619	1.03247	0.226597	0
chr1:149871080~149871946	866	5.41571	0.254517	0
chr1:149899626~149899893	267	0.408986	0.055784	0
chr1:149982154~149982860	706	0.332905	0.0595609	0
chr1:150039325~150039815	490	0.345031	0.0946352	0
chr1:150185903~150186106	203	0.190731	0.0757921	0
chr1:150206972~150207842	870	0.573104	0.0902994	0
chr1:150241048~150241654	606	0.0594586	0.0523523	0
chr1:150254366~150254637	271	0.928401	0.0255105	0
chr1:150266477~150266689	212	1.05104	0.114713	0
chr1:150293836~150294140	304	0.721441	0.0725548	0
chr1:150336832~150337289	457	0.654777	0.0677969	0
chr1:150488037~150488416	379	0.763719	0.120805	0
chr1:150529656~150529904	248	46.88	0.936118	1
chr1:150534076~150534301	225	0.457413	0.0949784	0
chr1:150601711~150602201	490	0.345958	0.135511	0
chr1:150848995~150849265	270	0	0.0452769	0
chr1:150898620~150898839	219	0.397462	0.0853583	0
chr1:150980736~150981092	356	0.1001	0.0717668	0
chr1:151020163~151020627	464	0.570233	0.072225	0
chr1:151031768~151032352	584	0.402436	0.0862878	0
chr1:151042871~151043537	666	0.332788	0.0921601	0
chr1:151170848~151171532	684	0.615271	0.0889169	0
chr1:151300523~151300724	201	2.19272	0.297508	0
chr1:151319327~151319545	218	0.171702	0.0591917	0
chr1:151372015~151372582	567	0.706702	0.0796081	0
chr1:151431541~151432032	491	0.146193	0.0357811	0
chr1:151445872~151446142	270	1.50882	0.118824	0
chr1:151483574~151483902	328	0.394659	0.074769	0
chr1:151512662~151513199	537	0.574794	0.102832	0
chr1:151584375~151585205	830	0.0936442	0.079708	0
chr1:151693992~151694282	290	0.797075	0.0757915	0
chr1:151735446~151736093	647	0.174046	0.0580802	0
chr1:151812254~151812525	271	3.3805	0.0967593	0
chr1:151881764~151882407	643	0.119637	0.0814807	0
chr1:151965658~151966387	729	0.528731	0.172629	0
chr1:151966633~151966893	260	1.53345	0.116537	0
chr1:152008839~152009112	273	0.253673	0.0814957	0
chr1:152084995~152085215	220	1.26033	0.105924	0
chr1:152161322~152161928	606	1.38499	0.318847	0
chr1:152188861~152189073	212	112.124	0.859253	1
chr1:152487979~152488270	291	1.0415	0.146229	0
chr1:152732959~152733338	379	43.5486	0.891365	1
chr1:153508425~153508840	415	0.428846	0.0341387	0
chr1:153606178~153606974	796	1.13073	0.115437	0
chr1:153631066~153631369	303	0.512756	0.0946373	0
chr1:153643319~153643529	210	1.16568	0.0934011	0
chr1:153662204~153662439	235	75.1109	0.925047	1
chr1:153700217~153700607	390	0.173901	0.0630494	0
chr1:153755958~153756335	377	0.681982	0.0694397	0
chr1:153914344~153914578	234	39.5078	0.964234	1
chr1:153918373~153919334	961	0.107932	0.0944689	0
chr1:153930547~153931130	583	0.507659	0.0901588	0
chr1:153935782~153936276	494	0.559089	0.070355	0
chr1:153939644~153939980	336	0.107096	0.0537698	0
chr1:153949713~153950525	812	0.338623	0.0657763	0
chr1:153963228~153963510	282	0.182707	0.041516	0
chr1:154155269~154155926	657	1.39412	0.0568348	0
chr1:154244711~154245289	578	0.305883	0.0828719	0
chr1:154298206~154298544	338	0.217386	0.0911435	0
chr1:154300976~154301528	552	0.869141	0.271222	0
chr1:154377671~154378445	774	0.188411	0.0412575	0
chr1:154530682~154530903	221	0.175267	0.0703231	0
chr1:154531055~154531565	510	0.0646136	0.0728969	0
chr1:154540234~154540573	339	0.318302	0.0978694	0
chr1:154543819~154544713	894	97.995	0.907519	1
chr1:154580381~154580797	416	0.524691	0.0715542	0
chr1:154599764~154600505	741	0.465743	0.0765887	0
chr1:154732823~154733436	613	0.989243	0.228357	0
chr1:154744587~154744864	277	47.5512	0.867255	1
chr1:154908963~154909931	968	0.245986	0.0798223	0
chr1:154933929~154934735	806	0.226747	0.0545821	0
chr1:154946238~154946498	260	0.136919	0.0634131	0
chr1:154946743~154947486	743	0.48268	0.0724519	0
chr1:154971871~154972404	533	0.0597449	0.0351742	0
chr1:154975210~154975411	201	0.700737	0.0103499	0
chr1:154975698~154976624	926	0.389831	0.0698357	0
chr1:154989750~154990234	484	0.622506	0.230841	0
chr1:155043413~155043922	509	0.601446	0.204057	0
chr1:155057188~155058056	868	0.334099	0.066267	0
chr1:155108008~155108611	603	0.0597539	0.0642456	0
chr1:155112977~155113179	202	0.53838	0.0540877	0
chr1:155145343~155145938	595	0.236602	0.0514063	0
chr1:155147186~155147444	258	1.42916	0.449842	0
chr1:155163435~155163818	383	0.370532	0.0665173	0
chr1:155164200~155165160	960	0.566237	0.072543	0
chr1:155178548~155178980	432	0.558494	0.0766908	0
chr1:155197117~155197534	417	0.411791	0.0538045	0
chr1:155220083~155220549	466	0.621397	0.0779279	0
chr1:155231813~155232312	499	0.219059	0.0536862	0
chr1:155239279~155239494	215	83.6966	0.951274	1
chr1:155242862~155243436	574	0.529764	0.0681701	0
chr1:155246992~155247748	756	0.340243	0.0604364	0
chr1:155278408~155278743	335	0.106356	0.0507822	0
chr1:155290607~155291001	394	3.39581	0.195474	0
chr1:155579733~155580328	595	0.499709	0.0972663	0
chr1:155715298~155715908	610	0.691124	0.0792872	0
chr1:155829110~155829431	321	0.110981	0.0483315	0
chr1:155830196~155830489	293	0.970024	0.140684	0
chr1:155904073~155904307	234	0.623627	0.0440582	0
chr1:155920652~155920898	246	85.5353	0.94002	1
chr1:155947679~155948490	811	0.268535	0.0921151	0
chr1:155990390~155990780	390	0.33994	0.069712	0
chr1:156051240~156051461	221	1.68523	0.1132	0
chr1:156052073~156052803	730	0.339017	0.0677147	0
chr1:156084487~156085097	610	0.231667	0.0592857	0
chr1:156105708~156106171	463	39.6392	0.891816	1
chr1:156163673~156164052	379	0.952502	0.11694	0
chr1:156182585~156183097	512	0.219035	0.0771899	0
chr1:156186238~156186647	409	92.9301	0.920732	1
chr1:156215369~156215899	530	0.589536	0.110798	0
chr1:156261200~156261425	225	12.6821	0.590259	1
chr1:156308174~156308442	268	0.540312	0.0528637	0
chr1:156338759~156339251	492	1.1746	0.351403	0
chr1:156358051~156358252	201	1.6146	0.161331	0
chr1:156426550~156427362	812	0.230677	0.0859389	0
chr1:156474943~156475320	377	0.439461	0.0947785	0
chr1:156542100~156542502	402	1.00498	0.184494	0
chr1:156561486~156561880	394	0.266436	0.167526	0
chr1:156611640~156612447	807	1.14316	0.319065	0
chr1:156616554~156616946	392	4.56968	0.269392	0
chr1:156627343~156627576	233	0.277442	0.162669	0
chr1:156646293~156647260	967	0.465465	0.217359	0
chr1:156698112~156698916	804	0.397922	0.0591024	0
chr1:156710799~156711146	347	0.195388	0.0863911	0
chr1:156737036~156738013	977	0.468607	0.0919608	0
chr1:156783524~156784037	513	0.351678	0.110571	0
chr1:156814882~156815792	910	0.79765	0.229104	0
chr1:156818623~156819192	569	1.54371	0.373547	0
chr1:156863416~156863711	295	0.127036	0.336512	0
chr1:156877770~156878649	879	52.0797	0.852653	1
chr1:156890244~156890806	562	0.71593	0.277617	0
chr1:156893520~156894232	712	1.14078	0.139503	0
chr1:156897200~156897796	596	0.897111	0.100573	0
chr1:157107750~157108645	895	0.315676	0.0964563	0
chr1:157164539~157165135	596	11.066	0.41684	0
chr1:157948721~157949053	332	6.60509	0.401812	0
chr1:157963541~157963947	406	0.689824	0.0878677	0
chr1:158083271~158083540	269	0.525805	0.0892015	0
chr1:158119489~158119704	215	0.64614	0.173293	0
chr1:158147434~158147854	420	12.848	0.507207	1
chr1:158150621~158151503	882	1.84243	0.0859861	0
chr1:159141203~159141718	515	1.14109	0.110241	0
chr1:159158229~159158498	269	0.424624	0.175948	0
chr1:159750417~159751353	936	0.336994	0.101216	0
chr1:159869902~159870143	241	9.0135	0.617651	1
chr1:159899433~159899853	420	66.9854	0.827213	1
chr1:159915369~159915797	428	0.918269	0.0527668	0
chr1:160001296~160001989	693	0.360209	0.0742602	0
chr1:160040129~160040668	539	0.409083	0.116911	0
chr1:160068041~160068430	389	0.265065	0.101607	0
chr1:160175133~160175702	569	0.254458	0.0963919	0
chr1:160231756~160232451	695	0.311224	0.0551502	0
chr1:160312929~160313338	409	0.757361	0.0462202	0
chr1:160340605~160340843	238	87.8967	0.844934	1
chr1:160370113~160370658	545	0.705634	0.0621993	0
chr1:160389104~160389386	282	60.527	0.909668	1
chr1:160771684~160771953	269	88.2287	0.923372	1
chr1:160990719~160991225	506	0.141671	0.0546444	0
chr1:161008378~161008830	452	2.78149	0.0775521	0
chr1:161049347~161049737	390	65.8976	0.765404	1
chr1:161068063~161068801	738	2.51211	0.257076	0
chr1:161087723~161088112	389	0.735664	0.116531	0
chr1:161102108~161102536	428	0.172197	0.0326774	0
chr1:161110860~161111107	247	62.1615	0.648315	1
chr1:161129139~161129689	550	0.44597	0.0797322	0
chr1:161136002~161136686	684	0.321229	0.0711515	0
chr1:161147062~161147451	389	0.274077	0.0606399	0
chr1:161171810~161172256	446	0.553073	0.283401	0
chr1:161228478~161229028	550	0.994259	0.203859	0
chr1:161283776~161284007	231	0.607483	0.0955399	0
chr1:161284119~161284451	332	0.884786	0.101244	0
chr1:161359500~161359876	376	0.493214	0.0479582	0
chr1:161500429~161500752	323	0.716523	0.0609531	0
chr1:161582034~161582377	343	0.21862	0.0591965	0
chr1:161719415~161720076	661	0.215328	0.0588327	0
chr1:161953617~161954039	422	69.0856	0.848897	1
chr1:162039451~162040052	601	0.453193	0.095827	0
chr1:162336877~162337321	444	89.46	0.91714	1
chr1:162467600~162468027	427	0.580228	0.0781513	0
chr1:162530857~162531853	996	0.213142	0.0735432	0
chr1:162760251~162760722	471	2.3109	0.236956	0
chr1:162792177~162792574	397	0.539143	0.166612	0
chr1:163291480~163292021	541	0.569363	0.0577383	0
chr1:163392878~163393100	222	85.542	0.923314	1
chr1:164290516~164290767	251	0.886733	0.148595	0
chr1:164545541~164545917	376	94.806	0.837481	1
chr1:165086757~165087026	269	0.860152	0.073597	0
chr1:165321704~165322318	614	0.957253	0.125917	0
chr1:165323487~165323811	324	0.346471	0.0833862	0
chr1:165567266~165567530	264	0.7281	0.0757795	0
chr1:165667545~165667817	272	0.409637	0.0562082	0
chr1:165737833~165738349	516	0.653636	0.0407756	0
chr1:165910641~165910978	337	58.9175	0.924211	1
chr1:166844997~166845773	776	0.536868	0.0532899	0
chr1:166853254~166853790	536	1.52182	0.346018	0
chr1:166889777~166890649	872	2.96616	0.31713	0
chr1:166916866~166917215	349	0.818551	0.101531	0
chr1:166944675~166945169	494	0.440505	0.0713527	0
chr1:166958221~166958683	462	89.6414	0.906955	1
chr1:167090576~167091010	434	1.00282	0.169399	0
chr1:167408513~167409137	624	1.82931	0.476396	0
chr1:167522470~167523070	600	0.471948	0.130817	0
chr1:167599465~167599839	374	0.672994	0.0627635	0
chr1:167683478~167683917	439	0.578565	0.040898	0
chr1:167684280~167684492	212	0.48533	0.0817669	0
chr1:167690979~167691852	873	0.323714	0.0940439	0
chr1:167789397~167789647	250	0.547835	0.158004	0
chr1:168025509~168025722	213	19.2499	0.622572	1
chr1:168105317~168106158	841	0.576913	0.0696269	0
chr1:168147964~168148637	673	0.253788	0.0482332	0
chr1:168194946~168195839	893	0.526482	0.0770012	0
chr1:169396622~169396869	247	0	0.0688888	0
chr1:169763974~169764347	373	0.484644	0.0610438	0
chr1:169862456~169862722	266	0.530008	0.0673177	0
chr1:170043611~170043997	386	0.375566	0.0921769	0
chr1:170630457~170630851	394	0.572013	0.092446	0
chr1:170633275~170634178	903	0.485212	0.126343	0
chr1:171454518~171455239	721	0.646609	0.0396306	0
chr1:171639948~171640224	276	105.064	0.88825	1
chr1:171710846~171711607	761	0.681782	0.0665425	0
chr1:171750400~171750934	534	0.134921	0.0487762	0
chr1:171753417~171753629	212	27.5734	0.937108	1
chr1:171810468~171811325	857	0.36629	0.0492296	0
chr1:172412868~172413281	413	0.275639	0.0512815	0
chr1:172501911~172502545	634	0.17043	0.0639378	0
chr1:173638663~173639045	382	0.770084	0.201572	0
chr1:173683986~173684403	417	0.547447	0.0638776	0
chr1:173793289~173794095	806	0.358763	0.0690345	0
chr1:173837173~173837917	744	0.184089	0.0658618	0
chr1:174128297~174129289	992	0.256989	0.0562989	0
chr1:174992366~174992796	430	0.420781	0.0538261	0
chr1:175048551~175048874	323	114.362	0.936399	1
chr1:175161901~175162364	463	0.350532	0.102532	0
chr1:175568377~175568808	431	6.19335	0.240158	0
chr1:177133393~177133846	453	0.349813	0.13113	0
chr1:177140121~177140323	202	0.934688	0.139742	0
chr1:177150815~177151165	350	1.17385	0.123866	0
chr1:178006831~178007284	453	0.609156	0.350304	0
chr1:178455800~178456286	486	7.46118	0.546309	1
chr1:178511363~178512356	993	0.357158	0.063207	0
chr1:179051076~179051948	872	0.167009	0.0529859	0
chr1:179262772~179263321	549	0.441779	0.054522	0
chr1:179334795~179335338	543	0.489665	0.102854	0
chr1:179544721~179545307	586	0.752883	0.155094	0
chr1:179555402~179555770	368	1.42152	0.14303	0
chr1:179560752~179561596	844	4.43167	0.348335	0
chr1:179846880~179847106	226	0.168003	0.125273	0
chr1:179851483~179852371	888	0.161234	0.059145	0
chr1:179923717~179924419	702	0.196945	0.0782239	0
chr1:180471326~180472277	951	0.597802	0.0654879	0
chr1:180601028~180601816	788	0.257737	0.0625558	0
chr1:180904317~180904711	394	101.626	0.919764	1
chr1:180922916~180923692	776	13.6078	0.31807	0
chr1:180991228~180991465	237	0.160239	0.0457414	0
chr1:180991720~180992149	429	0.0831064	0.0260536	0
chr1:181287301~181287873	572	0.434264	0.124168	0
chr1:181382291~181382848	557	114.918	0.878603	1
chr1:181451312~181452049	737	0.555324	0.113316	0
chr1:181452707~181453073	366	0.706179	0.208714	0
chr1:181454975~181455261	286	1.59103	0.111287	0
chr1:181767494~181767893	399	36.3232	0.925248	1
chr1:181998926~181999341	415	0.319511	0.115094	0
chr1:182025605~182026511	906	17.9919	0.527236	1
chr1:182573376~182573760	384	0.530878	0.0980551	0
chr1:182584178~182584545	367	0.388051	0.0627523	0
chr1:182758396~182759097	701	0.178633	0.0613604	0
chr1:182808313~182809122	809	0.476841	0.0783241	0
chr1:182921820~182922644	824	36.9644	0.691235	1
chr1:183774194~183774416	222	0.638047	0.139808	0
chr1:184020782~184021054	272	0.271898	0.0782899	0
chr1:184633224~184633663	439	2.32918	0.287852	0
chr1:184942863~184943777	914	0.480192	0.0622105	0
chr1:185014370~185015220	850	0.434836	0.0840413	0
chr1:185125851~185126705	854	0.349099	0.0629267	0
chr1:185703459~185703662	203	1.12194	0.105833	0
chr1:186344125~186344848	723	0.143275	0.0618288	0
chr1:186649311~186650081	770	0.538209	0.0981313	0
chr1:192777633~192778198	565	0.246583	0.0519758	0
chr1:193074175~193074778	603	0.472729	0.105741	0
chr1:193090729~193091224	495	0.0665676	0.0772808	0
chr1:196577709~196578011	302	1.11569	0.119571	0
chr1:196847159~196847418	259	1.92516	0.33312	0
chr1:197170006~197170719	713	0.350988	0.0681151	0
chr1:197743932~197744788	856	0.514246	0.0733993	0
chr1:197871589~197872299	710	0.207959	0.0618564	0
chr1:197885061~197885389	328	1.18216	0.128385	0
chr1:197887089~197887791	702	0.456372	0.111969	0
chr1:197890479~197890824	345	5.41804	0.438214	0
chr1:198125897~198126842	945	0.399662	0.0815036	0
chr1:198128148~198128364	216	0.479661	0.0926009	0
chr1:200004475~200004933	458	4.23567	0.221744	0
chr1:200008393~200009047	654	0.393691	0.0449239	0
chr1:200009808~200010036	228	1.1044	0.1766	0
chr1:200010626~200010832	206	1.50541	0.361156	0
chr1:200011401~200012055	654	0.803014	0.111444	0
chr1:200116697~200117204	507	91.4264	0.96002	1
chr1:200271277~200271538	261	0.445143	0.16299	0
chr1:200378900~200379365	465	0.153372	0.0978038	0
chr1:200589553~200590124	571	0.374363	0.0933072	0
chr1:200638547~200639384	837	0.289426	0.054232	0
chr1:200860077~200860576	499	0.63741	0.137471	0
chr1:200880594~200881270	676	78.2196	0.739583	1
chr1:200969624~200969938	314	97.4681	0.92551	1
chr1:200992283~200992839	556	0.18687	0.0652337	0
chr1:201123246~201123746	500	0.0636802	0.267725	0
chr1:201139875~201140504	629	0.708449	0.212552	0
chr1:201196031~201196267	236	63.606	0.867166	1
chr1:201368561~201369032	471	1.0126	0.151425	0
chr1:201450881~201451105	224	0.850013	0.193493	0
chr1:201475886~201476516	630	0.119184	0.0607891	0
chr1:201708788~201709429	641	2.21364	0.0830185	0
chr1:201798214~201798698	484	0.452784	0.0547458	0
chr1:201924337~201925053	716	0.275461	0.0675553	0
chr1:201951755~201952579	824	0.219155	0.0799839	0
chr1:202113152~202114143	991	0.308323	0.0876255	0
chr1:202162959~202163390	431	0.575861	0.177316	0
chr1:202183194~202183526	332	1.20016	0.174638	0
chr1:202311044~202311312	268	0.514693	0.0735379	0
chr1:202317658~202318196	538	0.207809	0.0796964	0
chr1:202678882~202679769	887	0.400408	0.0971655	0
chr1:202779791~202780684	893	0.339423	0.0780144	0
chr1:202830062~202830923	861	0.240979	0.0705054	0
chr1:202857684~202858394	710	0.315576	0.0449306	0
chr1:202896205~202896524	319	0.344939	0.0355504	0
chr1:202926880~202927476	596	0.417941	0.0573599	0
chr1:202936046~202936252	206	0.613098	0.0880654	0
chr1:202976329~202977028	699	4.78417	0.0541798	0
chr1:202995473~202996185	712	0.0974845	0.16992	0
chr1:203044723~203045390	667	7.86801	0.13719	0
chr1:203097234~203097496	262	0.932483	0.137371	0
chr1:203242520~203242818	298	1.21466	0.519106	1
chr1:203296278~203296929	651	0.384816	0.0891304	0
chr1:203455816~203456041	225	54.1594	0.951362	1
chr1:203456785~203457059	274	0.912973	0.0787878	0
chr1:203598472~203598853	381	9.0177	0.0392317	0
chr1:203764569~203765293	724	3.97371	0.0943171	0
chr1:203830508~203830901	393	0.0916025	0.048267	0
chr1:204120399~204121109	710	1.0773	0.198423	0
chr1:204159599~204159833	234	0.989289	0.0718869	0
chr1:204226545~204226908	363	33.0941	0.860963	1
chr1:204346733~204347430	697	5.02604	0.340892	0
chr1:204380314~204381159	845	0.204192	0.0716893	0
chr1:204463294~204464086	792	0.811498	0.0789054	0
chr1:204485474~204485831	357	0.105035	0.131436	0
chr1:204654133~204654885	752	0.509481	0.0846969	0
chr1:204797611~204797930	319	0.230294	0.168381	0
chr1:204950983~204951210	227	31.4641	0.874741	1
chr1:205038785~205039153	368	70.7215	0.844863	1
chr1:205179964~205180910	946	0.401698	0.0582446	0
chr1:205196792~205197252	460	0.30438	0.079671	0
chr1:205197633~205197959	326	0.764557	0.0917017	0
chr1:205210696~205210918	222	92.4985	0.919393	1
chr1:205238113~205238546	433	50.5136	0.887364	1
chr1:205290233~205291035	802	0.266622	0.0962831	0
chr1:205473878~205474109	231	0	0.0806689	0
chr1:205498004~205498590	586	8.2299	0.766437	1
chr1:205537752~205538443	691	0.211781	0.0919211	0
chr1:205561090~205561473	383	0.177071	0.070459	0
chr1:205600494~205601432	938	0.192739	0.0742595	0
chr1:205631978~205632254	276	76.9937	0.807413	1
chr1:205648976~205649903	927	0.369727	0.0807825	0
chr1:205743901~205744668	767	0.448368	0.0692645	0
chr1:205818899~205819191	292	70.714	0.367246	0
chr1:206223538~206224028	490	0.491922	0.0814515	0
chr1:206730398~206730908	510	4.74613	0.0963472	0
chr1:206785805~206786030	225	0.566281	0.0282565	0
chr1:206808524~206809187	663	0.450361	0.0301422	0
chr1:207082694~207083202	508	0.917432	0.165201	0
chr1:207224090~207224450	360	5.24043	0.0862221	0
chr1:207226282~207226842	560	0.733635	0.0736046	0
chr1:207494544~207495364	820	0.37979	0.0722206	0
chr1:207627532~207628280	748	1.0057	0.0890294	0
chr1:207669638~207670015	377	0.636716	0.145767	0
chr1:207818390~207818952	562	5.64433	0.23207	0
chr1:207842806~207843259	453	0.904292	0.151052	0
chr1:207925172~207925964	792	0.461314	0.107132	0
chr1:208041863~208042718	855	0.575338	0.0609857	0
chr1:208084099~208084513	414	0.340803	0.0725465	0
chr1:208132328~208133117	789	1.8916	0.18596	0
chr1:208136667~208137183	516	0	0.0805854	0
chr1:209404846~209405473	627	16.9109	0.420214	0
chr1:209799150~209799354	204	78.1541	0.899239	1
chr1:209848444~209849428	984	0.697984	0.151857	0
chr1:209920954~209921345	391	1.26153	0.163094	0
chr1:209957722~209958167	445	0.614624	0.0640035	0
chr1:209979317~209979666	349	0.941816	0.131332	0
chr1:210001130~210001428	298	0.5261	0.10196	0
chr1:210111180~210112054	874	0.804297	0.157237	0
chr1:210407402~210407637	235	1.19724	0.0872889	0
chr1:210465710~210466212	502	0.578486	0.158242	0
chr1:210502134~210502793	659	0.501866	0.0682231	0
chr1:210857060~210857262	202	76.4971	0.872202	1
chr1:211380407~211380783	376	93.8122	0.884292	1
chr1:211500152~211500636	484	0.424535	0.0411817	0
chr1:211555940~211556332	392	0.288942	0.0692125	0
chr1:211589678~211590293	615	30.5137	0.382674	0
chr1:211652307~211652754	447	24.2664	0.346873	0
chr1:211688462~211689104	642	0.422943	0.112374	0
chr1:211848642~211849176	534	0.773728	0.124994	0
chr1:212003432~212004280	848	0.201431	0.0663913	0
chr1:212208838~212209364	526	0.213216	0.0523828	0
chr1:212587592~212588284	692	0.317341	0.0696977	0
chr1:212606106~212606844	738	0.248918	0.147744	0
chr1:212688032~212688448	416	8.74209	0.363715	0
chr1:212731669~212732457	788	0.684197	0.196695	0
chr1:212964867~212965347	480	0.447534	0.0753852	0
chr1:213031360~213032119	759	0.671351	0.0916921	0
chr1:213188520~213189261	741	0	0.0807991	0
chr1:213224612~213224867	255	0.451225	0.0451783	0
chr1:213562740~213562958	218	61.1213	0.877002	1
chr1:214153215~214153668	453	7.48674	0.147357	0
chr1:214156001~214156851	850	0.741653	0.172985	0
chr1:214158727~214159080	353	0.607026	0.180591	0
chr1:214160799~214161034	235	0.32093	0.148005	0
chr1:214161198~214161415	217	0	0.0814216	0
chr1:214162509~214162737	228	0.549931	0.102467	0
chr1:214360608~214360965	357	1.47056	0.187141	0
chr1:214454097~214455047	950	0.192449	0.0752261	0
chr1:214557166~214557442	276	68.7373	0.896575	1
chr1:214724105~214725056	951	1.27053	0.107818	0
chr1:214725193~214725528	335	0.895409	0.109834	0
chr1:214776257~214776935	678	0.752365	0.0611465	0
chr1:214778909~214779709	800	88.8006	0.801285	1
chr1:214781663~214782556	893	96.3703	0.731043	1
chr1:215256052~215256636	584	0.380719	0.0962492	0
chr1:215740508~215741266	758	0.495084	0.046039	0
chr1:216774340~216774734	394	0.577023	0.0973362	0
chr1:217262999~217263214	215	0.485392	0.145304	0
chr1:217310750~217311178	428	0.325709	0.231425	0
chr1:217311468~217311773	305	0.688178	0.168385	0
chr1:217804268~217804477	209	0.151923	0.0763921	0
chr1:218458020~218458684	664	0.797117	0.0831018	0
chr1:218519058~218519674	616	0.497262	0.0700123	0
chr1:218520288~218520506	218	1.06701	0.115629	0
chr1:219347110~219347572	462	0.140219	0.0739468	0
chr1:219786335~219786562	227	58.2706	0.734622	1
chr1:220219417~220219824	407	0.281001	0.0668683	0
chr1:220267315~220267934	619	0.348926	0.103652	0
chr1:220445481~220445933	452	0.2727	0.0703917	0
chr1:220701508~220702348	840	1.32237	0.101933	0
chr1:220863508~220864249	741	0.407454	0.164181	0
chr1:220921412~220922176	764	0.797982	0.106212	0
chr1:220960017~220960603	586	0.564216	0.121169	0
chr1:221050449~221050864	415	15.7781	0.08664	0
chr1:221054555~221054888	333	0.827227	0.133956	0
chr1:221055493~221055800	307	31.9257	0.880684	1
chr1:221057464~221057757	293	48.4172	0.908494	1
chr1:221060851~221061071	220	0.956254	0.304213	0
chr1:221064890~221065600	710	1.41722	0.28829	0
chr1:221067448~221068185	737	14.1384	0.485083	0
chr1:221068783~221069159	376	39.8107	0.883763	1
chr1:222638762~222638973	211	0.85486	0.0538462	0
chr1:222763022~222763270	248	0.207655	0.0705239	0
chr1:222790948~222791220	272	0.564439	0.0361228	0
chr1:222791400~222792083	683	0.212028	0.0503414	0
chr1:222817468~222817671	203	0.529012	0.0960898	0
chr1:222885327~222886230	903	11.0881	0.11912	0
chr1:222988245~222988561	316	0.376484	0.0576538	0
chr1:223254819~223255041	222	0.434193	0.117715	0
chr1:223316186~223316689	503	0.356446	0.181045	0
chr1:223566643~223567268	625	14.2926	0.36239	0
chr1:223567682~223567986	304	61.3756	0.880491	1
chr1:223899991~223900823	832	0.29837	0.0844392	0
chr1:223936343~223937044	701	5.12811	0.29888	0
chr1:224180263~224180824	561	0.517015	0.182351	0
chr1:224301836~224302472	636	0.375338	0.0965094	0
chr1:224517730~224518193	463	0.459341	0.0821373	0
chr1:224544524~224545224	700	0.377476	0.0595487	0
chr1:224621561~224622106	545	0.0698476	0.0600312	0
chr1:224622598~224622818	220	0.495965	0.0718217	0
chr1:224805409~224805853	444	0.737641	0.156033	0
chr1:225117221~225117781	560	0.613515	0.0716399	0
chr1:225662766~225663041	275	0.977897	0.119854	0
chr1:225865069~225865328	259	5.68063	0.274787	0
chr1:225965331~225965734	403	3.78544	0.189242	0
chr1:225997647~225998233	586	0.127769	0.0852106	0
chr1:226075151~226075680	529	39.0878	0.644278	1
chr1:226111643~226112552	909	1.06144	0.137848	0
chr1:226127113~226127695	582	51.3484	0.701459	1
chr1:226186804~226187336	532	0.267923	0.0524965	0
chr1:226374036~226374760	724	0.498121	0.0572677	0
chr1:226411008~226411880	872	0.69037	0.151177	0
chr1:226595334~226595939	605	0.776304	0.0581035	0
chr1:226829583~226829803	220	55.8095	0.899691	1
chr1:226891033~226891381	348	0.107744	0.0866851	0
chr1:227058046~227058906	860	0.573797	0.123012	0
chr1:227163740~227164237	497	46.4552	0.777293	1
chr1:227729516~227730492	976	0.900163	0.298101	0
chr1:227746158~227746454	296	9.9699	0.5311	1
chr1:227747214~227747575	361	8.45199	0.529277	1
chr1:227748424~227748860	436	7.27978	0.399982	0
chr1:227751410~227751635	225	0.330287	0.104012	0
chr1:227916426~227916736	310	0.675779	0.0901921	0
chr1:227922644~227923431	787	0.355489	0.0582472	0
chr1:227974429~227974827	398	23.5628	0.733127	1
chr1:228003828~228004083	255	45.7692	0.889648	1
chr1:228075378~228075750	372	2.42442	0.46584	0
chr1:228112951~228113215	264	75.2245	0.86425	1
chr1:228161369~228161576	207	32.468	0.882413	1
chr1:228225443~228225753	310	1.1109	0.0660835	0
chr1:228246632~228247197	565	2.70461	0.309078	0
chr1:228295369~228295569	200	31.1206	0.841552	1
chr1:228296788~228297276	488	0.517843	0.0574657	0
chr1:228353109~228353986	877	0.386921	0.0554953	0
chr1:228362443~228362691	248	85.0395	0.920134	1
chr1:228403233~228403528	295	83.5788	0.963783	1
chr1:228404149~228404397	248	106.735	0.880795	1
chr1:228404718~228405013	295	65.0429	0.91051	1
chr1:228461886~228462139	253	103.361	0.959611	1
chr1:228467965~228468497	532	82.6193	0.866795	1
chr1:228473836~228474043	207	103.449	0.890161	1
chr1:228509554~228509763	209	42.1557	0.898668	1
chr1:228548078~228548330	252	108.317	0.898039	1
chr1:228558946~228559246	300	121.341	0.932935	1
chr1:228582429~228582894	465	69.5342	0.936581	1
chr1:228593812~228594713	901	0.461042	0.0781205	0
chr1:228603707~228604567	860	0.524843	0.126189	0
chr1:228612581~228613103	522	69.6541	0.881976	1
chr1:228633383~228634127	744	0.478174	0.0969604	0
chr1:228657328~228657561	233	4.15656	0.326147	0
chr1:228658938~228659152	214	51.769	0.751989	1
chr1:228742997~228743461	464	76.8183	0.659871	1
chr1:228785987~228786204	217	4.4976	0.521794	1
chr1:228890743~228890951	208	51.0628	0.755854	1
chr1:229406647~229407129	482	0.782986	0.106673	0
chr1:229478015~229478935	920	0.541373	0.0459992	0
chr1:229542944~229543770	826	1.54744	0.101541	0
chr1:229643714~229644293	579	0.24405	0.0582964	0
chr1:229730342~229730617	275	55.7591	0.929017	1
chr1:230415343~230415689	346	39.8778	0.840385	1
chr1:230468505~230468850	345	53.3348	0.727403	1
chr1:230492717~230492945	228	61.0907	0.926862	1
chr1:230778078~230778593	515	0.349623	0.0725202	0
chr1:231176786~231177009	223	1.20158	0.317076	0
chr1:231296560~231297345	785	0.50121	0.199721	0
chr1:231376797~231377243	446	0.244809	0.0582895	0
chr1:231664000~231664608	608	0.687896	0.062185	0
chr1:231762415~231763115	700	0.310472	0.083321	0
chr1:232941055~232941707	652	0.81248	0.19681	0
chr1:233086192~233086595	403	0.428575	0.0535219	0
chr1:233121928~233122136	208	102.629	0.921794	1
chr1:233431150~233431540	390	0.772494	0.0725985	0
chr1:233463527~233464414	887	0.583914	0.0607634	0
chr1:233497708~233497917	209	33.9888	0.906731	1
chr1:233749374~233750314	940	0.655728	0.103976	0
chr1:234349885~234350471	586	0.385219	0.105163	0
chr1:234367136~234367496	360	88.0863	0.686116	1
chr1:234492485~234492860	375	41.9179	0.692806	1
chr1:234508995~234509501	506	0.798645	0.0453066	0
chr1:234735535~234736120	585	0.36336	0.08577	0
chr1:235267555~235267829	274	0.397422	0.112209	0
chr1:235291741~235292387	646	0.375395	0.103097	0
chr1:235324265~235324717	452	0.458413	0.0505355	0
chr1:235805319~235805771	452	24.1965	0.238917	0
chr1:235814281~235814488	207	0.58532	0.412239	0
chr1:236156874~236157271	397	91.313	0.942497	1
chr1:236304759~236305025	266	0.961766	0.0843991	0
chr1:236511354~236511777	423	92.8146	0.927297	1
chr1:236558460~236559336	876	0.876161	0.0687308	0
chr1:236687072~236687608	536	0.439918	0.106366	0
chr1:236767362~236767998	636	0.441011	0.0457143	0
chr1:236849473~236850323	850	0.995656	0.246969	0
chr1:236958315~236959202	887	0.509849	0.0778013	0
chr1:237947188~237947448	260	70.9947	0.930914	1
chr1:240160838~240161616	778	1.82181	0.16344	0
chr1:240370860~240371526	666	36.5537	0.889463	1
chr1:240656254~240656720	466	53.3573	0.520919	1
chr1:240986655~240986909	254	96.3796	0.916105	1
chr1:241520104~241520790	686	0.478236	0.0954448	0
chr1:241587602~241587883	281	1.5295	0.0945051	0
chr1:241682474~241683112	638	0.118528	0.0744932	0
chr1:241802961~241803649	688	0.421984	0.102219	0
chr1:242011152~242011744	592	0.34413	0.0660262	0
chr1:242220285~242220615	330	69.7083	0.790573	1
chr1:242220750~242221000	250	50.044	0.751468	1
chr1:242686917~242687476	559	0.386807	0.256021	0
chr1:242687923~242688682	759	0.486368	0.122989	0
chr1:243053598~243054072	474	1.06954	0.321479	0
chr1:243264941~243265196	255	19.6603	0.0901005	0
chr1:243637640~243638142	502	95.1628	0.940557	1
chr1:243646395~243646888	493	1.27816	0.201969	0
chr1:243650991~243651529	538	76.6387	0.85694	1
chr1:243652414~243652763	349	58.3017	0.917414	1
chr1:244012713~244013245	532	0.540761	0.0260742	0
chr1:244013803~244014592	789	0.463291	0.0724121	0
chr1:244080541~244081093	552	1.25424	0.0724103	0
chr1:244094756~244095117	361	15.7172	0.645146	1
chr1:244142852~244143055	203	68.1217	0.912875	1
chr1:244213398~244213619	221	0.160972	0.329058	0
chr1:244218275~244218538	263	63.0836	0.873936	1
chr1:244624502~244624920	418	0.563211	0.0620239	0
chr1:244816200~244817080	880	0.143418	0.0593124	0
chr1:244893442~244894366	924	1.60849	0.275892	0
chr1:245740994~245741204	210	81.2705	0.874206	1
chr1:245753400~245753636	236	112.752	0.903118	1
chr1:245836324~245836747	423	48.1414	0.944253	1
chr1:245848540~245849103	563	65.4398	0.914929	1
chr1:246414749~246415569	820	134.12	0.890952	1
chr1:246670149~246670768	619	0.280437	0.0440659	0
chr1:246783198~246783917	719	48.74	0.801141	1
chr1:246887265~246888028	763	0.128192	0.0639248	0
chr1:246952215~246952511	296	0.653167	0.146985	0
chr1:247170869~247171434	565	0.924141	0.0846296	0
chr1:247241580~247242201	621	0.488873	0.0916032	0
chr1:247267180~247267884	704	0.39431	0.0766871	0
chr1:247279205~247279461	256	35.979	0.544178	1
chr1:247373736~247374304	568	0.46612	0.0798762	0
chr1:247463849~247464710	861	73.8946	0.949687	1
chr1:247614696~247614944	248	27.8074	0.88601	1
chr1:247681400~247681951	551	56.7721	0.601127	1
chr1:247694036~247694501	465	43.3012	0.775012	1
chr1:247802739~247803141	402	20.5765	0.257907	0
chr1:248020331~248021252	921	0.503374	0.0972248	0
chr1:248100326~248100726	400	1.55475	0.492808	0
chr1:248855031~248855470	439	119.033	0.773806	1
chr1:249106096~249106517	421	87.1766	0.964965	1
chr1:249120451~249120731	280	0.262892	0.0696511	0
chr1:249167409~249168010	601	0.346316	0.0647227	0
chr1:249200253~249200721	468	0	0.0518991	0
chr10:94527~95301	774	97.6622	0.731344	1
chr10:119610~120162	552	0.888351	0.19909	0
chr10:122103~122620	517	3.15042	0.419017	0
chr10:346505~346828	323	115.718	0.91977	1
chr10:372933~373159	226	51.6005	0.935944	1
chr10:387295~387544	249	120.875	0.935892	1
chr10:395171~395404	233	52.8144	0.869029	1
chr10:396944~397228	284	70.0087	0.931082	1
chr10:409202~409523	321	90.701	0.857073	1
chr10:413852~414165	313	25.5408	0.765576	1
chr10:422181~422411	230	85.9892	0.919082	1
chr10:444910~445131	221	55.1739	0.913962	1
chr10:459693~460058	365	45.4147	0.843761	1
chr10:465929~466396	467	89.2178	0.922887	1
chr10:518193~518471	278	75.3859	0.950281	1
chr10:525720~526041	321	30.8457	0.911338	1
chr10:530714~531099	385	28.7018	0.627196	1
chr10:575899~576131	232	109.8	0.927184	1
chr10:630310~630950	640	75.3261	0.90008	1
chr10:652260~652528	268	55.646	0.874978	1
chr10:669071~669336	265	59.9193	0.908614	1
chr10:685034~685407	373	146.936	0.877348	1
chr10:685845~686202	357	73.7543	0.876771	1
chr10:711897~712395	498	54.0722	0.837571	1
chr10:734708~735606	898	0.54579	0.161199	0
chr10:743241~743479	238	33.1169	0.687206	1
chr10:772294~772508	214	122.664	0.937255	1
chr10:839609~840210	601	54.0002	0.797574	1
chr10:851101~851525	424	75.8755	0.82853	1
chr10:855627~855885	258	65.1166	0.901739	1
chr10:977261~978072	811	0.126498	0.132326	0
chr10:1021642~1022509	867	71.2512	0.909083	1
chr10:1033791~1034615	824	0.248662	0.0899661	0
chr10:1147968~1148271	303	136.385	0.856793	1
chr10:1205563~1205859	296	106.837	0.898792	1
chr10:1209315~1209521	206	124.276	0.903504	1
chr10:1219147~1219427	280	54.3831	0.848869	1
chr10:1230814~1231214	400	51.9506	0.813968	1
chr10:1252142~1252505	363	44.1278	0.855457	1
chr10:1284152~1284422	270	58.7965	0.853745	1
chr10:1368904~1369891	987	35.9828	0.86069	1
chr10:1382501~1383006	505	57.3661	0.855625	1
chr10:1415977~1416249	272	82.1168	0.920467	1
chr10:1506345~1506708	363	70.9362	0.861527	1
chr10:1516980~1517313	333	55.5148	0.642924	1
chr10:1583538~1583998	460	27.0249	0.848321	1
chr10:1585175~1585421	246	22.8291	0.901715	1
chr10:1595543~1595792	249	17.0438	0.857378	1
chr10:2357249~2357471	222	160.797	0.867566	1
chr10:2543464~2544121	657	32.2981	0.69993	1
chr10:2815004~2815469	465	46.0549	0.906254	1
chr10:2932076~2932447	371	52.2066	0.91403	1
chr10:3145920~3146206	286	79.766	0.917429	1
chr10:3148407~3148625	218	83.3952	0.897872	1
chr10:3160889~3161107	218	86.1838	0.946891	1
chr10:3180175~3180578	403	66.0846	0.926574	1
chr10:3214722~3215260	538	0	0.0581819	0
chr10:3360015~3360948	933	104.706	0.839298	1
chr10:3374120~3374383	263	30.7652	0.908741	1
chr10:3500333~3500576	243	35.7397	0.789641	1
chr10:3598476~3598930	454	40.5293	0.768744	1
chr10:3823790~3824017	227	20.2947	0.563255	1
chr10:4868126~4868949	823	8.21306	0.221925	0
chr10:5454432~5454779	347	0.425863	0.0862777	0
chr10:5488485~5488686	201	0.628274	0.2688	0
chr10:5540786~5541515	729	83.7935	0.869996	1
chr10:5554343~5554607	264	67.2186	0.879627	1
chr10:5567123~5567828	705	85.3293	0.909836	1
chr10:5683649~5683878	229	80.2761	0.965503	1
chr10:5707981~5708798	817	0.26813	0.0851154	0
chr10:5882304~5882635	331	6.72087	0.41965	0
chr10:6130787~6131774	987	0.251597	0.0519787	0
chr10:6205500~6206211	711	0.357882	0.0718756	0
chr10:6262648~6262871	223	80.5366	0.756141	1
chr10:6621908~6622642	734	0.251931	0.0956455	0
chr10:7213843~7214103	260	128.579	0.882421	1
chr10:7409559~7409784	225	88.4277	0.904457	1
chr10:7618378~7618615	237	53.0034	0.943736	1
chr10:7621719~7621950	231	87.7593	0.923918	1
chr10:7829589~7830517	928	0.523887	0.0799038	0
chr10:7860262~7861107	845	0.766675	0.0778387	0
chr10:8077830~8078378	548	0.581044	0.187784	0
chr10:8100385~8100768	383	77.052	0.896424	1
chr10:8555659~8556102	443	63.2677	0.784193	1
chr10:11207179~11207980	801	0.540911	0.0711981	0
chr10:11386303~11386875	572	85.5944	0.82078	1
chr10:11505223~11505766	543	73.983	0.930194	1
chr10:11784408~11784937	529	4.476	0.151929	0
chr10:11865126~11865984	858	0.562969	0.117891	0
chr10:11911555~11912432	877	77.7418	0.876567	1
chr10:11936170~11937060	890	67.1437	0.891643	1
chr10:12110701~12111303	602	0.570891	0.0953878	0
chr10:12171226~12172038	812	0.376999	0.0558287	0
chr10:12237833~12238377	544	0.608255	0.0778701	0
chr10:13043095~13043781	686	0.833444	0.13612	0
chr10:13141779~13142493	714	0.364392	0.0882632	0
chr10:13203437~13203790	353	0.31181	0.0443872	0
chr10:13341378~13342223	845	0.30483	0.0951478	0
chr10:13344236~13344498	262	0.759275	0.0658701	0
chr10:13513908~13514169	261	116.402	0.737393	1
chr10:13515186~13515427	241	62.2998	0.712162	1
chr10:13516166~13516747	581	111.946	0.863287	1
chr10:13570129~13570864	735	0.318822	0.115225	0
chr10:13628790~13629266	476	0.853235	0.0892007	0
chr10:13698563~13699540	977	84.4994	0.86977	1
chr10:13933483~13934184	701	0.548083	0.125773	0
chr10:14645753~14646705	952	0.231669	0.0859947	0
chr10:14995681~14996431	750	0.647572	0.0759415	0
chr10:15001273~15001840	567	0.490743	0.0699005	0
chr10:15130387~15130913	526	0.295136	0.082	0
chr10:15138966~15139851	885	0.314809	0.065622	0
chr10:15209825~15210714	889	0.322131	0.0510871	0
chr10:15254599~15254852	253	91.4817	0.935155	1
chr10:15255055~15255287	232	57.2261	0.904939	1
chr10:15412420~15413040	620	0.767951	0.06349	0
chr10:15761424~15762101	677	0.663118	0.143434	0
chr10:15902080~15902402	322	0.398542	0.0596027	0
chr10:16478804~16479303	499	2.63798	0.0828652	0
chr10:16859090~16859975	885	0.348254	0.14769	0
chr10:17243305~17243787	482	0.321155	0.0436622	0
chr10:17658666~17659639	973	0.449058	0.0802527	0
chr10:17686098~17686335	237	1.09271	0.082684	0
chr10:18940529~18940765	236	0.748361	0.0348729	0
chr10:18948114~18948711	597	0.498623	0.0348444	0
chr10:18999145~18999390	245	69.2644	0.864187	1
chr10:20106644~20106946	302	1.02687	0.155636	0
chr10:21788634~21789588	954	6.42205	0.536847	1
chr10:21805198~21805459	261	0.136396	0.0648905	0
chr10:21805880~21806630	750	0.242016	0.152305	0
chr10:21814787~21815716	929	0.0343052	0.0853121	0
chr10:21816297~21816528	231	0.741314	0.133435	0
chr10:22292301~22292897	596	0.41059	0.0606723	0
chr10:22518027~22518334	307	0.788129	0.0561121	0
chr10:22604908~22605632	724	0.291847	0.0577549	0
chr10:22614276~22614934	658	0.135521	0.120407	0
chr10:22629361~22630328	967	0.235312	0.114168	0
chr10:22634001~22634862	861	0.881532	0.18958	0
chr10:23384534~23385078	544	0.45974	0.0858748	0
chr10:23461301~23461610	309	0.803399	0.16537	0
chr10:23483898~23484498	600	0.464249	0.229853	0
chr10:23487758~23488543	785	0.506145	0.142718	0
chr10:23982383~23982589	206	0.328479	0.150306	0
chr10:25241111~25241900	789	0.786583	0.0743059	0
chr10:25305319~25306024	705	0.308059	0.0600463	0
chr10:26500608~26501126	518	0.711033	0.20335	0
chr10:26680635~26680999	364	3.45016	0.318448	0
chr10:26727062~26727992	930	0.43185	0.0838636	0
chr10:26855907~26856198	291	61.1116	0.956349	1
[truncated: 17,890 more rows]
